# Supplementary material for: Organocatalytic domino Knöevenagel–Michael reaction in water for the regioselective synthesis of benzo[4,5]imidazo[1,2-a]pyrimidines and pyrido[2,3-d]pyrimidin-2-amines
Source: Royal Society of Chemistry journal article supplement (doi:10.1039/c6ra21376f), 2016-01-01

## SUPPORTING INFORMATION

### **Organocatalytic domino Knöevenagel-Michael reaction in water for the regioselective synthesis of benzimidazo[1,2-*a*]pyrimidines and pyrido[2,3-*d*]pyrimidin-2-amines**

Subarna Jyoti Kalita, Dibakar Chandra Deka\* and Hormi Mecadon\*

Department of Chemistry, University of Gauhati, G. B. Nagar, Guwahati 781014, Assam, India

E-mail: [hmecadon@gmail.com](mailto:hmecadon@gmail.com)

#### **1. Compound characterization data from (4aa-4bn) and (6aa-6bh)**

##### **Ethyl 2-methyl-4-phenyl-1,4-dihydrobenzo[4,5]imidazo[1,2-*a*]pyrimidine-3-carboxylate (4aa)**

|                                                                                                 |                                                                                                                                                                                                                                                                                                                                                                                                                                                                                                                                                                                                                                                                                                                                                                                                                                                                                                                                       |
|-------------------------------------------------------------------------------------------------|---------------------------------------------------------------------------------------------------------------------------------------------------------------------------------------------------------------------------------------------------------------------------------------------------------------------------------------------------------------------------------------------------------------------------------------------------------------------------------------------------------------------------------------------------------------------------------------------------------------------------------------------------------------------------------------------------------------------------------------------------------------------------------------------------------------------------------------------------------------------------------------------------------------------------------------|
| 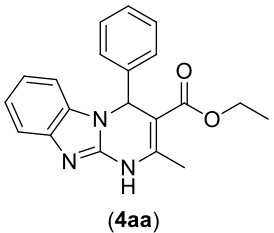 <p>(4aa)</p> | Yield, 0.303 g (91%). White solid, mp 287-288 °C. <sup>1</sup> H NMR (300 MHz, DMSO- <i>d</i> <sub>6</sub> ): δ(ppm) 1.09-1.14 (t, 3H, <i>J</i> = 7.2 Hz), 2.44 (s, 3H), 3.95-4.04 (m, 2H), 6.40 (s, 1H), 6.90-6.95 (t, 1H, <i>J</i> = 7.5 Hz), 6.99-7.04 (t, 1H, <i>J</i> = 7.5 MHz), 7.13-7.35 (m, 7H), 10.81 (s, 1H); <sup>13</sup> C (100 MHz, DMSO- <i>d</i> <sub>6</sub> ) δ(ppm) 13.9, 18.5, 55.8, 59.3, 97.8, 109.7, 116.7, 120.1, 121.7, 127.0, 127.7, 128.3, 131.4, 141.9, 142.2, 145.5, 146.4, 165.1; IR (KBr) ( $\nu_{\max}$ / cm <sup>-1</sup> ) 3028, 2972, 2942, 2856, 1697, 1616, 1570, 1257; MS (ESI) <i>m/z</i> calcd for C <sub>20</sub> H <sub>19</sub> N <sub>3</sub> O <sub>2</sub> : 333.15; found 334.0 [M + H] <sup>+</sup> , 356.0 [M + Na] <sup>+</sup> ; anal. calcd for C <sub>20</sub> H <sub>19</sub> N <sub>3</sub> O <sub>2</sub> : C, 72.05; H, 5.74; N, 12.60. Found C, 72.18; H, 5.91; N, 12.42%. |
|-------------------------------------------------------------------------------------------------|---------------------------------------------------------------------------------------------------------------------------------------------------------------------------------------------------------------------------------------------------------------------------------------------------------------------------------------------------------------------------------------------------------------------------------------------------------------------------------------------------------------------------------------------------------------------------------------------------------------------------------------------------------------------------------------------------------------------------------------------------------------------------------------------------------------------------------------------------------------------------------------------------------------------------------------|

##### **Ethyl 4-(2-chlorophenyl)-2-methyl-1,4-dihydrobenzo[4,5]imidazo[1,2-*a*]pyrimidine-3-carboxylate (4ab)**

|                                                                                                  |                                                                                                                                                                                                                                                                                                                                                                                                                                                                                                                                                                                                                                                                                                                                                                                                                                                                                                                                                 |
|--------------------------------------------------------------------------------------------------|-------------------------------------------------------------------------------------------------------------------------------------------------------------------------------------------------------------------------------------------------------------------------------------------------------------------------------------------------------------------------------------------------------------------------------------------------------------------------------------------------------------------------------------------------------------------------------------------------------------------------------------------------------------------------------------------------------------------------------------------------------------------------------------------------------------------------------------------------------------------------------------------------------------------------------------------------|
| 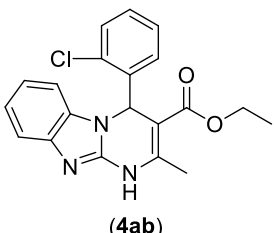 <p>(4ab)</p> | Yield, 0.337 g (92%). White solid, mp 192-193 °C. <sup>1</sup> H NMR (300 MHz, DMSO- <i>d</i> <sub>6</sub> ): δ(ppm) 1.03-1.08 (t, 3H, <i>J</i> = 7.2 Hz), 2.44 (s, 3H), 3.95-3.98 (m, 2H), 6.72 (s, 1H), 6.91-6.96 (t, 1H, <i>J</i> = 7.2 Hz), 7.00-7.06 (t, 1H, <i>J</i> = 7.8 Hz), 7.16-7.44 (m, 6H), 10.93 (s, 1H); <sup>13</sup> C (100 MHz, DMSO- <i>d</i> <sub>6</sub> ) δ(ppm) 13.9, 18.6, 53.6, 59.2, 96.2, 109.1, 116.8, 120.2, 121.8, 127.7, 129.4, 129.6, 130.5, 131.5, 138.7, 142.0, 145.1, 147.2, 164.9; IR (KBr) ( $\nu_{\max}$ / cm <sup>-1</sup> ) 3026, 2976, 2926, 2856, 1699, 1620, 1775, 1253; MS (ESI) <i>m/z</i> calcd for C <sub>20</sub> H <sub>18</sub> ClN <sub>3</sub> O <sub>2</sub> : 367.11; found 368.0 [M + H] <sup>+</sup> , 390.1 [M + Na] <sup>+</sup> ; anal. calcd for C <sub>20</sub> H <sub>18</sub> ClN <sub>3</sub> O <sub>2</sub> : C, 65.31; H, 4.93; N, 11.42. Found C, 65.13; H, 4.81; N, 11.58%. |
|--------------------------------------------------------------------------------------------------|-------------------------------------------------------------------------------------------------------------------------------------------------------------------------------------------------------------------------------------------------------------------------------------------------------------------------------------------------------------------------------------------------------------------------------------------------------------------------------------------------------------------------------------------------------------------------------------------------------------------------------------------------------------------------------------------------------------------------------------------------------------------------------------------------------------------------------------------------------------------------------------------------------------------------------------------------|

Ethyl 4-(3-fluorophenyl)-2-methyl-1,4-dihydrobenzo[4,5]imidazo[1,2-*a*]pyrimidine-3-carboxylate (**4ac**)

|                                                                                                                                   |                                                                                                                                                                                                                                                                                                                                                                                                                                                                                                                                                                                                                                                                                                                                                                                                                                                                                    |
|-----------------------------------------------------------------------------------------------------------------------------------|------------------------------------------------------------------------------------------------------------------------------------------------------------------------------------------------------------------------------------------------------------------------------------------------------------------------------------------------------------------------------------------------------------------------------------------------------------------------------------------------------------------------------------------------------------------------------------------------------------------------------------------------------------------------------------------------------------------------------------------------------------------------------------------------------------------------------------------------------------------------------------|
| 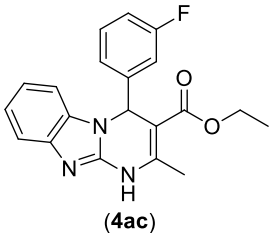 <p style="text-align: center;"><b>(4ac)</b></p> | <p>Yield, 0.315 g (90%). White solid, mp 287-288 °C. <sup>1</sup>H NMR (300 MHz, DMSO-<i>d</i><sub>6</sub>): δ(ppm) 1.10-1.15 (t, 3H, <i>J</i> = 7.2 Hz), 2.44 (s, 3H), 3.97-4.05 (m, 2H), 6.45 (s, 1H), 6.92-7.06 (m, 3H), 7.11 (d, 1H, <i>J</i> = 7.8 Hz), 7.22-7.35 (m, 4H), 10.89 (s, 1H); <sup>13</sup>C (100 MHz, DMSO-<i>d</i><sub>6</sub>): δ(ppm) 13.9, 18.6, 55.2, 59.3, 97.2, 109.8, 116.7, 120.2, 121.8, 122.9, 130.4, 130.5, 131.3, 142.1, 144.6, 144.7, 145.3, 146.9, 163.0, 165.0; IR (KBr) (<i>v</i><sub>max</sub>/ cm<sup>-1</sup>) 3051, 2976, 2927, 2862, 1697, 1616, 1571, 1259; MS (ESI) <i>m/z</i> calcd for C<sub>20</sub>H<sub>18</sub>FN<sub>3</sub>O<sub>2</sub>: 351.14; found 352.1 [M + H]<sup>+</sup>; anal. calcd for C<sub>20</sub>H<sub>18</sub>FN<sub>3</sub>O<sub>2</sub>: C, 68.36; H, 5.16; N, 11.96. Found C, 68.19; H, 5.28; N, 12.09%.</p> |
|-----------------------------------------------------------------------------------------------------------------------------------|------------------------------------------------------------------------------------------------------------------------------------------------------------------------------------------------------------------------------------------------------------------------------------------------------------------------------------------------------------------------------------------------------------------------------------------------------------------------------------------------------------------------------------------------------------------------------------------------------------------------------------------------------------------------------------------------------------------------------------------------------------------------------------------------------------------------------------------------------------------------------------|

Ethyl 4-(4-methoxyphenyl)-2-methyl-1,4-dihydrobenzo[4,5]imidazo[1,2-*a*]pyrimidine-3-carboxylate (**4ad**)

|                                                                                                                                    |                                                                                                                                                                                                                                                                                                                                                                                                                                                                                                                                                                                                                                                                                                                                                                                                                                                                                                                                       |
|------------------------------------------------------------------------------------------------------------------------------------|---------------------------------------------------------------------------------------------------------------------------------------------------------------------------------------------------------------------------------------------------------------------------------------------------------------------------------------------------------------------------------------------------------------------------------------------------------------------------------------------------------------------------------------------------------------------------------------------------------------------------------------------------------------------------------------------------------------------------------------------------------------------------------------------------------------------------------------------------------------------------------------------------------------------------------------|
| 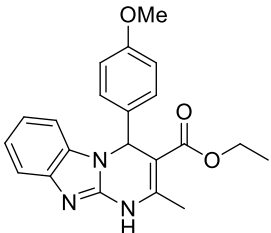 <p style="text-align: center;"><b>(4ad)</b></p> | <p>Yield, 0.319 g (88%). White solid, mp 273-274 °C. <sup>1</sup>H NMR (300 MHz, DMSO-<i>d</i><sub>6</sub>): δ(ppm) 1.11-1.15 (t, 3H, <i>J</i> = 7.2 Hz), 2.43 (s, 3H), 3.64 (s, 3H), 3.97-4.00 (m, 2H), 6.36 (s, 1H), 6.77 (d, 2H, <i>J</i> = 8.7 Hz), 6.92-6.95 (m, 1H), 6.99-7.01 (m, 1H), 7.22-7.33 (m, 4H), 10.76 (s, 1H); <sup>13</sup>C (100 MHz, DMSO-<i>d</i><sub>6</sub>): δ(ppm) 14.0, 18.5, 54.8, 55.2, 59.2, 98.0, 109.8, 113.5, 116.6, 120.0, 121.6, 128.2, 131.4, 134.1, 142.2, 145.5, 146.0, 158.5, 165.1; IR (KBr) (<i>v</i><sub>max</sub>/ cm<sup>-1</sup>) 3049, 2977, 2926, 2856, 1694, 1613, 1570, 1253; MS (ESI) <i>m/z</i> calcd for C<sub>21</sub>H<sub>21</sub>N<sub>3</sub>O<sub>3</sub>: 363.16; found 364.1 [M + H]<sup>+</sup>, 386.0 [M + Na]<sup>+</sup>; anal. calcd for C<sub>21</sub>H<sub>21</sub>N<sub>3</sub>O<sub>3</sub>: C, 69.41; H, 5.82; N, 11.56. Found C, 69.22; H, 5.99; N, 11.67%.</p> |
|------------------------------------------------------------------------------------------------------------------------------------|---------------------------------------------------------------------------------------------------------------------------------------------------------------------------------------------------------------------------------------------------------------------------------------------------------------------------------------------------------------------------------------------------------------------------------------------------------------------------------------------------------------------------------------------------------------------------------------------------------------------------------------------------------------------------------------------------------------------------------------------------------------------------------------------------------------------------------------------------------------------------------------------------------------------------------------|

Ethyl 4-(3,5-dimethoxyphenyl)-2-methyl-1,4-dihydrobenzo[4,5]imidazo[1,2-*a*]pyrimidine-3-carboxylate (**4ae**)

|                                                                                                                                     |                                                                                                                                                                                                                                                                                                                                                                                                                                                                                                                                                                                                                                                                                                                                                                                                                                                                                                           |
|-------------------------------------------------------------------------------------------------------------------------------------|-----------------------------------------------------------------------------------------------------------------------------------------------------------------------------------------------------------------------------------------------------------------------------------------------------------------------------------------------------------------------------------------------------------------------------------------------------------------------------------------------------------------------------------------------------------------------------------------------------------------------------------------------------------------------------------------------------------------------------------------------------------------------------------------------------------------------------------------------------------------------------------------------------------|
| 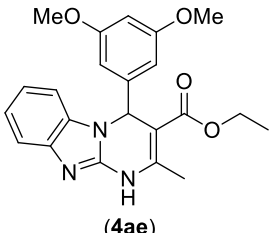 <p style="text-align: center;"><b>(4ae)</b></p> | <p>Yield, 0.334 g (85%). White Solid, mp &gt; 300 °C. <sup>1</sup>H NMR (300 MHz, DMSO-<i>d</i><sub>6</sub>): δ(ppm) 1.14-1.18 (t, 3H, <i>J</i> = 6.9 Hz), 2.42 (s, 3H), 3.64 (s, 6H), 3.99-4.05 (m, 2H), 6.32-6.34 (m, 2H), 6.43-6.44 (m, 2H), 6.93-7.06 (m, 2H), 7.30-7.34 (m, 2H), 10.79 (s, 1H); <sup>13</sup>C (100 MHz, DMSO-<i>d</i><sub>6</sub>): δ(ppm) 14.0, 18.5, 55.0, 55.6, 59.3, 97.6, 98.5, 105.3, 109.9, 116.7, 120.1, 121.7, 131.5, 142.2, 144.2, 145.5, 146.5, 160.2, 165.1; IR (KBr) (<i>v</i><sub>max</sub>/ cm<sup>-1</sup>) 3047, 2971, 2922, 2846, 1695, 1600, 1581, 1246; MS (ESI) <i>m/z</i> calcd for C<sub>22</sub>H<sub>23</sub>N<sub>3</sub>O<sub>4</sub>: 393.17; found 394.0 [M + H]<sup>+</sup>, 416.1 [M + Na]<sup>+</sup>; anal. calcd for C<sub>22</sub>H<sub>23</sub>N<sub>3</sub>O<sub>4</sub>: C, 67.16; H, 5.89; N, 10.68. Found C, 67.30; H, 5.78; N, 10.55%.</p> |
|-------------------------------------------------------------------------------------------------------------------------------------|-----------------------------------------------------------------------------------------------------------------------------------------------------------------------------------------------------------------------------------------------------------------------------------------------------------------------------------------------------------------------------------------------------------------------------------------------------------------------------------------------------------------------------------------------------------------------------------------------------------------------------------------------------------------------------------------------------------------------------------------------------------------------------------------------------------------------------------------------------------------------------------------------------------|

Ethyl 4-(furan-2-yl)-2-methyl-1,4-dihydrobenzo[4,5]imidazo[1,2-*a*]pyrimidine-3-carboxylate (**4af**)

|                                                                                                                                   |                                                                                                                                                                                                                                                                                                                                                                                                                                                                                                                                                                                                                                                                                                                                                                                                                                                                                                                                                     |
|-----------------------------------------------------------------------------------------------------------------------------------|-----------------------------------------------------------------------------------------------------------------------------------------------------------------------------------------------------------------------------------------------------------------------------------------------------------------------------------------------------------------------------------------------------------------------------------------------------------------------------------------------------------------------------------------------------------------------------------------------------------------------------------------------------------------------------------------------------------------------------------------------------------------------------------------------------------------------------------------------------------------------------------------------------------------------------------------------------|
| 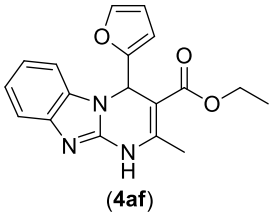 <p style="text-align: center;"><b>(4af)</b></p> | <p>Yield, 0.258 g (80%). Yellow solid, mp &gt; 300 °C. <sup>1</sup>H NMR (300 MHz, DMSO-<i>d</i><sub>6</sub>): δ(ppm) 1.11-1.16 (t, 3H, <i>J</i> = 6.9 Hz), 2.44 (s, 3H), 4.01-4.08 (m, 2H), 6.30 (d, 1H, <i>J</i> = 2.1 Hz), 6.44 (d, 1H, <i>J</i> = 3.0 Hz), 6.55 (s, 1H), 7.01-7.09 (m, 2H), 7.33-7.35 (m, 1H), 7.40-7.43 (m, 2H), 10.84 (s, 1H); <sup>13</sup>C (100 MHz, DMSO-<i>d</i><sub>6</sub>): δ(ppm) 14.0, 18.6, 49.0, 59.3, 94.2, 107.7, 109.7, 110.3, 116.7, 120.2, 121.8, 131.4, 142.0, 142.5, 145.5, 147.7, 152.6, 165.0; IR (KBr) (<math>\nu_{\max}</math>/cm<sup>-1</sup>) 3044, 2973, 2921, 2845, 1693, 1605, 1571, 1241; MS (ESI) <i>m/z</i> calcd for C<sub>18</sub>H<sub>17</sub>N<sub>3</sub>O<sub>3</sub>: 323.13; found 324.0 [M + H]<sup>+</sup>, 346.1 [M + Na]<sup>+</sup>; anal. calcd for C<sub>18</sub>H<sub>17</sub>N<sub>3</sub>O<sub>3</sub>: C, 66.86; H, 5.30; N, 13.00. Found C, 67.05; H, 5.19; N, 12.84%</p> |
|-----------------------------------------------------------------------------------------------------------------------------------|-----------------------------------------------------------------------------------------------------------------------------------------------------------------------------------------------------------------------------------------------------------------------------------------------------------------------------------------------------------------------------------------------------------------------------------------------------------------------------------------------------------------------------------------------------------------------------------------------------------------------------------------------------------------------------------------------------------------------------------------------------------------------------------------------------------------------------------------------------------------------------------------------------------------------------------------------------|

Ethyl 2-methyl-4-(pyridin-2-yl)-1,4-dihydrobenzo[4,5]imidazo[1,2-*a*]pyrimidine-3-carboxylate (**4ag**)

|                                                                                                                                    |                                                                                                                                                                                                                                                                                                                                                                                                                                                                                                                                                                                                                                                                                                                                                                                                                                                                                                                                                                      |
|------------------------------------------------------------------------------------------------------------------------------------|----------------------------------------------------------------------------------------------------------------------------------------------------------------------------------------------------------------------------------------------------------------------------------------------------------------------------------------------------------------------------------------------------------------------------------------------------------------------------------------------------------------------------------------------------------------------------------------------------------------------------------------------------------------------------------------------------------------------------------------------------------------------------------------------------------------------------------------------------------------------------------------------------------------------------------------------------------------------|
| 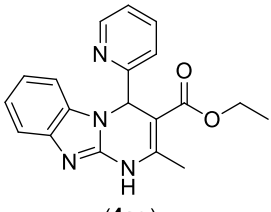 <p style="text-align: center;"><b>(4ag)</b></p> | <p>Yield, 0.310 g (93%). White solid, mp &gt; 300 °C. <sup>1</sup>H NMR (300 MHz, DMSO-<i>d</i><sub>6</sub>): δ(ppm): 1.07-1.12 (t, 3H, <i>J</i> = 7.2 Hz), 2.42 (s, 3H), 3.96-4.01 (m, 2H), 6.49 (s, 1H), 6.88-6.93 (m, 1H), 6.98-7.03 (m, 1H), 7.14-7.18 (m, 1H), 7.25-7.32 (m, 2H), 7.62-7.64 (m, 1H), 7.70-7.75 (m, 1H), 8.34-8.35 (m, 1H), 10.77 (s, 1H); <sup>13</sup>C (100 MHz, DMSO-<i>d</i><sub>6</sub>): δ(ppm) 14.0, 18.7, 57.0, 59.2, 96.0, 109.5, 116.6, 120.0, 121.6, 122.4, 122.9, 131.6, 136.3, 142.1, 145.9, 147.6, 149.4, 159.2, 165.1; IR (KBr) (<math>\nu_{\max}</math>/cm<sup>-1</sup>) 3035, 2974, 2918, 2850, 1695, 1612, 1569, 1251; MS (ESI) <i>m/z</i> calcd for C<sub>19</sub>H<sub>18</sub>N<sub>4</sub>O<sub>2</sub>: 334.14; found 335.0 [M + H]<sup>+</sup>, 357.1 [M + Na]<sup>+</sup>; anal. calcd for C<sub>19</sub>H<sub>18</sub>N<sub>4</sub>O<sub>2</sub>: C, 68.25; H, 5.43; N, 16.76. Found C, 68.38; H, 5.62; N, 16.59%</p> |
|------------------------------------------------------------------------------------------------------------------------------------|----------------------------------------------------------------------------------------------------------------------------------------------------------------------------------------------------------------------------------------------------------------------------------------------------------------------------------------------------------------------------------------------------------------------------------------------------------------------------------------------------------------------------------------------------------------------------------------------------------------------------------------------------------------------------------------------------------------------------------------------------------------------------------------------------------------------------------------------------------------------------------------------------------------------------------------------------------------------|

Ethyl 2-methyl-4-(naphthalen-2-yl)-1,4-dihydrobenzo[4,5]imidazo[1,2-*a*]pyrimidine-3-carboxylate (**4ah**)

|                                                                                                                                     |                                                                                                                                                                                                                                                                                                                                                                                                                                                                                                                                                                                                                                                                                                                                                                                                                                                                                                                                                                           |
|-------------------------------------------------------------------------------------------------------------------------------------|---------------------------------------------------------------------------------------------------------------------------------------------------------------------------------------------------------------------------------------------------------------------------------------------------------------------------------------------------------------------------------------------------------------------------------------------------------------------------------------------------------------------------------------------------------------------------------------------------------------------------------------------------------------------------------------------------------------------------------------------------------------------------------------------------------------------------------------------------------------------------------------------------------------------------------------------------------------------------|
| 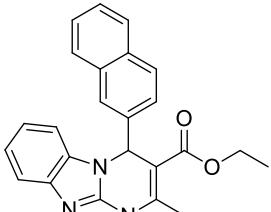 <p style="text-align: center;"><b>(4ah)</b></p> | <p>Yield, 0.306 g (80%). White solid, mp 148-149 °C. <sup>1</sup>H NMR (300 MHz, DMSO-<i>d</i><sub>6</sub>): δ(ppm) 1.08-1.13 (t, 3H, <i>J</i> = 6.9 Hz), 2.47 (s, 3H), 3.95-3.98 (m, 2H), 6.58 (s, 1H), 6.88 (m, 1H), 6.99 (m, 1H), 7.25-7.37 (m, 3H), 7.44-7.49 (m, 2H), 7.76-7.80 (m, 2H), 7.88-7.90 (m, 1H), 7.99 (s, 1H), 10.87 (s, 1H); <sup>13</sup>C (100 MHz, DMSO-<i>d</i><sub>6</sub>): δ(ppm) 14.0, 18.6, 56.1, 59.3, 97.5, 109.7, 116.7, 120.1, 121.7, 124.6, 126.2, 126.3, 127.4, 127.8, 128.3, 131.5, 132.3, 139.0, 142.2, 145.4, 146.5, 165.1; IR (KBr) (<math>\nu_{\max}</math>/cm<sup>-1</sup>) 3036, 2972, 2920, 2851, 1693, 1615, 1566, 1253; MS (ESI) <i>m/z</i> calcd for C<sub>24</sub>H<sub>21</sub>N<sub>3</sub>O<sub>2</sub>: 383.16; found 383.9 [M + H]<sup>+</sup>, 405.9 [M + Na]<sup>+</sup>; anal. calcd for C<sub>24</sub>H<sub>21</sub>N<sub>3</sub>O<sub>2</sub>: C, 75.18; H, 5.52; N, 10.96. Found C, 75.31; H, 5.36; N, 11.13%.</p> |
|-------------------------------------------------------------------------------------------------------------------------------------|---------------------------------------------------------------------------------------------------------------------------------------------------------------------------------------------------------------------------------------------------------------------------------------------------------------------------------------------------------------------------------------------------------------------------------------------------------------------------------------------------------------------------------------------------------------------------------------------------------------------------------------------------------------------------------------------------------------------------------------------------------------------------------------------------------------------------------------------------------------------------------------------------------------------------------------------------------------------------|

Ethyl 4-benzyl-2-methyl-1,4-dihydrobenzo[4,5]imidazo[1,2-*a*]pyrimidine-3-carboxylate (**4ai**)

|                                                                                                                                   |                                                                                                                                                                                                                                                                                                                                                                                                                                                                                                                                                                                                                                                                                                                                                                                                                                                                                                                                                                                                   |
|-----------------------------------------------------------------------------------------------------------------------------------|---------------------------------------------------------------------------------------------------------------------------------------------------------------------------------------------------------------------------------------------------------------------------------------------------------------------------------------------------------------------------------------------------------------------------------------------------------------------------------------------------------------------------------------------------------------------------------------------------------------------------------------------------------------------------------------------------------------------------------------------------------------------------------------------------------------------------------------------------------------------------------------------------------------------------------------------------------------------------------------------------|
| 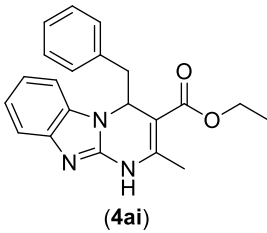 <p style="text-align: center;"><b>(4ai)</b></p> | <p>Yield, 0.277 g (80%). White solid, mp 129-130 °C. <sup>1</sup>H NMR (300 MHz, DMSO-<i>d</i><sub>6</sub>): δ(ppm): 1.26-1.31 (t, 3H, <i>J</i> = 6.9 Hz), 2.14 (s, 3H), 2.84-2.90 (m, 1H), 3.19-3.25 (m, 1H), 4.14-4.23 (m, 2H), 5.78 (m, 1H), 6.38 (d, 2H, <i>J</i> = 7.2 Hz), 7.01-7.14 (m, 5H), 7.35 (d, 1H, <i>J</i> = 7.2 Hz), 7.45 (d, 1H, <i>J</i> = 7.2 Hz), 10.00 (s, 1H); <sup>13</sup>C (100 MHz, DMSO-<i>d</i><sub>6</sub>): δ(ppm) 14.3, 18.3, 38.3, 52.8, 59.3, 93.9, 109.4, 116.9, 120.1, 121.6, 124.4, 126.4, 127.5, 129.3, 131.3, 135.8, 142.1, 146.2, 148.3, 165.3; IR (KBr) (<i>v</i><sub>max</sub>/ cm<sup>-1</sup>) 3057, 2974, 2926, 2858, 1697, 1620, 1570, 1263; MS (ESI) <i>m/z</i> calcd for C<sub>21</sub>H<sub>21</sub>N<sub>3</sub>O<sub>2</sub>: 347.16; found 348.0 [M + H]<sup>+</sup>, 370.1 [M + Na]<sup>+</sup>; anal. calcd for C<sub>21</sub>H<sub>21</sub>N<sub>3</sub>O<sub>2</sub>: C, 72.60; H, 6.09; N, 12.10. Found C, 72.74; H, 6.21; N, 11.97%.</p> |
|-----------------------------------------------------------------------------------------------------------------------------------|---------------------------------------------------------------------------------------------------------------------------------------------------------------------------------------------------------------------------------------------------------------------------------------------------------------------------------------------------------------------------------------------------------------------------------------------------------------------------------------------------------------------------------------------------------------------------------------------------------------------------------------------------------------------------------------------------------------------------------------------------------------------------------------------------------------------------------------------------------------------------------------------------------------------------------------------------------------------------------------------------|

Ethyl 4-butyl-2-methyl-1,4-dihydrobenzo[4,5]imidazo[1,2-*a*]pyrimidine-3-carboxylate (**4aj**)

|                                                                                                                                    |                                                                                                                                                                                                                                                                                                                                                                                                                                                                                                                                                                                                                                                                                                                                                                                                                                                                                                               |
|------------------------------------------------------------------------------------------------------------------------------------|---------------------------------------------------------------------------------------------------------------------------------------------------------------------------------------------------------------------------------------------------------------------------------------------------------------------------------------------------------------------------------------------------------------------------------------------------------------------------------------------------------------------------------------------------------------------------------------------------------------------------------------------------------------------------------------------------------------------------------------------------------------------------------------------------------------------------------------------------------------------------------------------------------------|
| 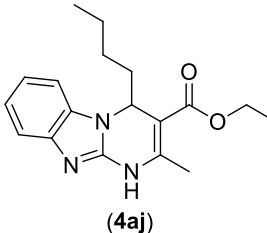 <p style="text-align: center;"><b>(4aj)</b></p> | <p>Yield, 0.234 g (75%). White solid, mp 196-197 °C. <sup>1</sup>H NMR (300 MHz, DMSO-<i>d</i><sub>6</sub>): δ(ppm) 0.63-0.68 (m, 4H), 0.81-0.86 (m, 2H), 1.21-1.26 (m, 4H), 1.45 (m, 1H), 2.15-2.19 (m, 1H), 2.37 (s, 3H), 4.11-4.18 (m, 2H), 5.57 (m, 1H), 6.81-6.84 (m, 1H), 7.05-7.09 (m, 3H), 10.47 (s, 1H); <sup>13</sup>C (100 MHz, DMSO-<i>d</i><sub>6</sub>): δ(ppm) 13.7, 14.2, 18.6, 21.8, 24.8, 33.3, 51.5, 59.3, 95.6, 109.2, 116.8, 120.1, 121.5, 131.3, 142.4, 146.8, 148.0, 165.4; IR (KBr) (<i>v</i><sub>max</sub>/ cm<sup>-1</sup>) 3055, 2973, 2921, 2853, 1696, 1623, 1572, 1265; MS (ESI) <i>m/z</i> calcd for C<sub>18</sub>H<sub>23</sub>N<sub>3</sub>O<sub>2</sub>: 313.18; found 313.9 [M + H]<sup>+</sup>, 335.9 [M + Na]<sup>+</sup>; anal. Calcd for C<sub>18</sub>H<sub>23</sub>N<sub>3</sub>O<sub>2</sub>: C, 68.98; H, 7.40; N, 13.41. Found C, 68.86; H, 7.56; N, 13.59%.</p> |
|------------------------------------------------------------------------------------------------------------------------------------|---------------------------------------------------------------------------------------------------------------------------------------------------------------------------------------------------------------------------------------------------------------------------------------------------------------------------------------------------------------------------------------------------------------------------------------------------------------------------------------------------------------------------------------------------------------------------------------------------------------------------------------------------------------------------------------------------------------------------------------------------------------------------------------------------------------------------------------------------------------------------------------------------------------|

Methyl 4-(2-fluorophenyl)-2-methyl-1,4-dihydrobenzo[4,5]imidazo[1,2-*a*]pyrimidine-3-carboxylate (**4bk**)

|                                                                                                                                     |                                                                                                                                                                                                                                                                                                                                                                                                                                                                                                                                                                                                                                                                                                                                                                                                                                                 |
|-------------------------------------------------------------------------------------------------------------------------------------|-------------------------------------------------------------------------------------------------------------------------------------------------------------------------------------------------------------------------------------------------------------------------------------------------------------------------------------------------------------------------------------------------------------------------------------------------------------------------------------------------------------------------------------------------------------------------------------------------------------------------------------------------------------------------------------------------------------------------------------------------------------------------------------------------------------------------------------------------|
| 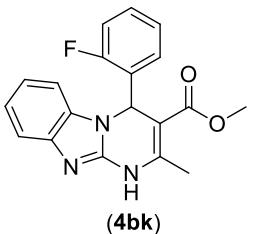 <p style="text-align: center;"><b>(4bk)</b></p> | <p>Yield, 0.293 g (87%). White solid, mp 254-255 °C. <sup>1</sup>H NMR (300 MHz, DMSO-<i>d</i><sub>6</sub>): δ(ppm): 2.44 (s, 3H), 3.52 (s, 3H), 6.62 (s, 1H), 6.94-7.13 (m, 5H), 7.21-7.28 (m, 1H), 7.32-7.34 (m, 1H), 7.41-7.46 (m, 1H), 10.98 (s, 1H); <sup>13</sup>C (100 MHz, DMSO-<i>d</i><sub>6</sub>): δ(ppm) 18.6, 50.5, 50.7, 95.7, 108.8, 116.8, 120.3, 121.8, 124.6, 128.1, 128.3, 129.8, 129.9, 130.0, 131.3, 142.0, 145.3, 147.4, 158.1, 160.6, 165.4; IR (KBr) (<i>v</i><sub>max</sub>/ cm<sup>-1</sup>) 3053, 2924, 2852, 1710, 1622, 1577, 1255; MS (ESI) <i>m/z</i> calcd for C<sub>19</sub>H<sub>16</sub>FN<sub>3</sub>O<sub>2</sub>: 337.12; found 338.1 [M + H]<sup>+</sup>; anal. Calcd for C<sub>19</sub>H<sub>16</sub>FN<sub>3</sub>O<sub>2</sub>: C, 67.65; H, 4.78; N, 12.46. Found C, 67.83; H, 4.61; N, 12.58%.</p> |
|-------------------------------------------------------------------------------------------------------------------------------------|-------------------------------------------------------------------------------------------------------------------------------------------------------------------------------------------------------------------------------------------------------------------------------------------------------------------------------------------------------------------------------------------------------------------------------------------------------------------------------------------------------------------------------------------------------------------------------------------------------------------------------------------------------------------------------------------------------------------------------------------------------------------------------------------------------------------------------------------------|

Methyl 4-(3-bromophenyl)-2-methyl-1,4-dihydrobenzo[4,5]imidazo[1,2-*a*]pyrimidine-3-carboxylate (**4bl**)

|                                                                                                                                   |                                                                                                                                                                                                                                                                                                                                                                                                                                                                                                                                                                                                                                                                                                                                                                                                                                                    |
|-----------------------------------------------------------------------------------------------------------------------------------|----------------------------------------------------------------------------------------------------------------------------------------------------------------------------------------------------------------------------------------------------------------------------------------------------------------------------------------------------------------------------------------------------------------------------------------------------------------------------------------------------------------------------------------------------------------------------------------------------------------------------------------------------------------------------------------------------------------------------------------------------------------------------------------------------------------------------------------------------|
| 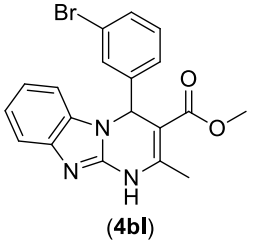 <p style="text-align: center;"><b>(4bl)</b></p> | <p>Yield, 0.317 g (80%). Yellow solid mp 258-259 °C. <sup>1</sup>H NMR (300 MHz, DMSO-<i>d</i><sub>6</sub>): δ(ppm) 2.44 (s, 3H), 3.56 (s, 3H), 6.45 (s, 1H), 6.96-7.06 (m, 2H), 7.19-7.24 (m, 1H), 7.28-7.39 (m, 4H), 7.53 (s, 1H), 10.93 (s, 1H); <sup>13</sup>C (100 MHz, DMSO-<i>d</i><sub>6</sub>): δ(ppm) 18.7, 50.8, 55.0, 97.2, 109.8, 116.8, 120.3, 121.5, 121.9, 125.9, 129.5, 130.7, 131.2, 142.1, 144.5, 145.3, 147.1, 165.5; IR (KBr) (<math>\nu_{\max}</math>/ cm<sup>-1</sup>) 3055, 2941, 2839, 1678, 1618, 1570, 1263; MS (ESI) <i>m/z</i> calcd for C<sub>19</sub>H<sub>16</sub>BrN<sub>3</sub>O<sub>2</sub>: 397.04; found 398.0 [M + H]<sup>+</sup>, 420.0 [M + Na]<sup>+</sup>; anal. calcd for C<sub>19</sub>H<sub>16</sub>BrN<sub>3</sub>O<sub>2</sub>: C, 57.30; H, 4.05; N, 10.55. Found C, 57.47; H, 4.18; N, 10.62.</p> |
|-----------------------------------------------------------------------------------------------------------------------------------|----------------------------------------------------------------------------------------------------------------------------------------------------------------------------------------------------------------------------------------------------------------------------------------------------------------------------------------------------------------------------------------------------------------------------------------------------------------------------------------------------------------------------------------------------------------------------------------------------------------------------------------------------------------------------------------------------------------------------------------------------------------------------------------------------------------------------------------------------|

Methyl 4-(4-chlorophenyl)-2-methyl-1,4-dihydrobenzo[4,5]imidazo[1,2-*a*]pyrimidine-3-carboxylate (**4bm**)

|                                                                                                                                    |                                                                                                                                                                                                                                                                                                                                                                                                                                                                                                                                                                                                                                                                                                                                                                                                                   |
|------------------------------------------------------------------------------------------------------------------------------------|-------------------------------------------------------------------------------------------------------------------------------------------------------------------------------------------------------------------------------------------------------------------------------------------------------------------------------------------------------------------------------------------------------------------------------------------------------------------------------------------------------------------------------------------------------------------------------------------------------------------------------------------------------------------------------------------------------------------------------------------------------------------------------------------------------------------|
| 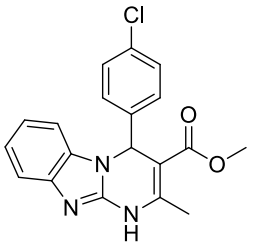 <p style="text-align: center;"><b>(4bm)</b></p> | <p>Yield, 0.285 g (81%). White solid mp 267-268 °C. <sup>1</sup>H NMR (300 MHz, DMSO-<i>d</i><sub>6</sub>): δ(ppm) 2.43 (s, 3H), 3.55 (s, 3H), 6.45 (s, 1H), 6.91-7.10 (m, 2H), 7.23-7.37 (m, 6H), 10.90 (s, 1H); <sup>13</sup>C (100 MHz, DMSO-<i>d</i><sub>6</sub>): δ(ppm) 18.6, 50.8, 55.0, 97.3, 109.7, 116.8, 120.2, 121.8, 128.4, 128.8, 131.0, 131.3, 132.2, 140.9, 142.1, 145.3, 146.9, 165.5; IR (KBr) (<math>\nu_{\max}</math>/ cm<sup>-1</sup>) 3051, 2934, 2837, 1671, 1619, 1571, 1267; MS (ESI) <i>m/z</i> calcd for C<sub>19</sub>H<sub>16</sub>ClN<sub>3</sub>O<sub>2</sub>: 353.09; found 353.9 [M + H]<sup>+</sup>, 375.9 [M + Na]<sup>+</sup>; anal. calcd for C<sub>19</sub>H<sub>16</sub>ClN<sub>3</sub>O<sub>2</sub>: C, 64.50; H, 4.56; N, 11.88. Found C, 64.38; H, 4.41; N, 12.06%.</p> |
|------------------------------------------------------------------------------------------------------------------------------------|-------------------------------------------------------------------------------------------------------------------------------------------------------------------------------------------------------------------------------------------------------------------------------------------------------------------------------------------------------------------------------------------------------------------------------------------------------------------------------------------------------------------------------------------------------------------------------------------------------------------------------------------------------------------------------------------------------------------------------------------------------------------------------------------------------------------|

Methyl 2-methyl-4-(4-nitrophenyl)-1,4-dihydrobenzo[4,5]imidazo[1,2-*a*]pyrimidine-3-carboxylate (**4bn**)

|                                                                                                                                     |                                                                                                                                                                                                                                                                                                                                                                                                                                                                                                                                                                                                                                                                                                                                                                                                                                                                                                                         |
|-------------------------------------------------------------------------------------------------------------------------------------|-------------------------------------------------------------------------------------------------------------------------------------------------------------------------------------------------------------------------------------------------------------------------------------------------------------------------------------------------------------------------------------------------------------------------------------------------------------------------------------------------------------------------------------------------------------------------------------------------------------------------------------------------------------------------------------------------------------------------------------------------------------------------------------------------------------------------------------------------------------------------------------------------------------------------|
| 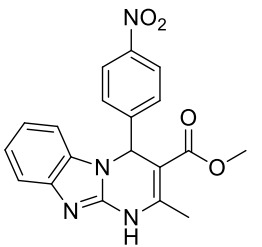 <p style="text-align: center;"><b>(4bn)</b></p> | <p>Yield, 0.309 g (85%). Yellow solid mp 276-278 °C. <sup>1</sup>H NMR (300 MHz, DMSO-<i>d</i><sub>6</sub>): δ(ppm) 2.45 (s, 3H), 3.56 (s, 3H), 6.60 (m, 1H), 6.94-7.06 (m, 2H), 7.23 (d, 1H, <i>J</i> = 7.8 Hz), 7.33 (d, 1H, <i>J</i> = 7.8 Hz), 7.60 (d, 2H, <i>J</i> = 8.4 Hz), 8.10 (d, 2H, <i>J</i> = 8.4 Hz), 11.01 (s, 1H); <sup>13</sup>C (75 MHz, DMSO-<i>d</i><sub>6</sub>): δ(ppm) 18.7, 50.8, 55.0, 96.6, 109.6, 116.9, 120.4, 122.0, 123.7, 128.3, 131.2, 142.1, 145.1, 146.8, 147.5, 148.8, 165.4; IR (KBr) (<math>\nu_{\max}</math>/ cm<sup>-1</sup>) 3053, 2938, 2835, 1670, 1615, 1565, 1259; MS (ESI) <i>m/z</i> calcd for C<sub>19</sub>H<sub>16</sub>N<sub>4</sub>O<sub>4</sub>: 364.12; found 364.9 [M + H]<sup>+</sup>, 386.9 [M + Na]<sup>+</sup>; anal. calcd for C<sub>19</sub>H<sub>16</sub>N<sub>4</sub>O<sub>4</sub>: C, 62.63; H, 4.43; N, 15.38. Found C, 62.80; H, 4.54; N, 15.55%.</p> |
|-------------------------------------------------------------------------------------------------------------------------------------|-------------------------------------------------------------------------------------------------------------------------------------------------------------------------------------------------------------------------------------------------------------------------------------------------------------------------------------------------------------------------------------------------------------------------------------------------------------------------------------------------------------------------------------------------------------------------------------------------------------------------------------------------------------------------------------------------------------------------------------------------------------------------------------------------------------------------------------------------------------------------------------------------------------------------|

Ethyl 2-amino-7-methyl-4-oxo-5-phenyl-3,4,5,8-tetrahydropyrido[2,3-*d*]pyrimidine-6-carboxylate (**6aa**)

|                                                                                                                                   |                                                                                                                                                                                                                                                                                                                                                                                                                                                                                                                                                                                                                                                                                                                                                                                                                                                              |
|-----------------------------------------------------------------------------------------------------------------------------------|--------------------------------------------------------------------------------------------------------------------------------------------------------------------------------------------------------------------------------------------------------------------------------------------------------------------------------------------------------------------------------------------------------------------------------------------------------------------------------------------------------------------------------------------------------------------------------------------------------------------------------------------------------------------------------------------------------------------------------------------------------------------------------------------------------------------------------------------------------------|
| 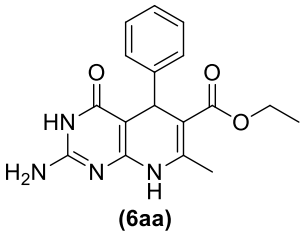 <p style="text-align: center;"><b>(6aa)</b></p> | <p>Yield, 0.267 g (82%). White solid mp &gt;300 °C. <sup>1</sup>H NMR (300 MHz, DMSO-<i>d</i><sub>6</sub>): δ(ppm) 1.05-1.10 (t, 3H, <i>J</i> = 6.9 Hz), 2.28 (s, 3H), 3.88-3.95 (m, 2H), 4.82 (s, 1H), 6.37 (s, 2H), 7.02-7.08 (m, 1H), 7.15-7.16 (m, 4H), 9.05 (s, 1H), 10.60 (s, 1H); <sup>13</sup>C (100 MHz, DMSO-<i>d</i><sub>6</sub>): δ(ppm) 14.0, 18.3, 58.7, 90.9, 101.1, 125.5, 127.1, 127.6, 147.0, 148.0, 153.9, 161.5, 166.8; IR (KBr) (<i>v</i><sub>max</sub>/ cm<sup>-1</sup>) 3334, 3231, 3115, 2980, 2926, 1649, 1602, 1560, 1282; MS (ESI) <i>m/z</i> calcd for C<sub>17</sub>H<sub>18</sub>N<sub>4</sub>O<sub>3</sub>: 326.14; found 327.0 [M + H]<sup>+</sup>, 349.1 [M + Na]<sup>+</sup>; anal. calcd for C<sub>17</sub>H<sub>18</sub>N<sub>4</sub>O<sub>3</sub>: C, 62.57; H, 5.56; N, 17.17. Found C, 62.76; H, 5.71; N, 17.01%.</p> |
|-----------------------------------------------------------------------------------------------------------------------------------|--------------------------------------------------------------------------------------------------------------------------------------------------------------------------------------------------------------------------------------------------------------------------------------------------------------------------------------------------------------------------------------------------------------------------------------------------------------------------------------------------------------------------------------------------------------------------------------------------------------------------------------------------------------------------------------------------------------------------------------------------------------------------------------------------------------------------------------------------------------|

Ethyl 2-amino-7-methyl-5-(3-nitrophenyl)-4-oxo-3,4,5,8-tetrahydropyrido[2,3-*d*]pyrimidine-6-carboxylate (**6ab**)

|                                                                                                                                    |                                                                                                                                                                                                                                                                                                                                                                                                                                                                                                                                                                                                                                                                                                                                                                                                                                                                                                                   |
|------------------------------------------------------------------------------------------------------------------------------------|-------------------------------------------------------------------------------------------------------------------------------------------------------------------------------------------------------------------------------------------------------------------------------------------------------------------------------------------------------------------------------------------------------------------------------------------------------------------------------------------------------------------------------------------------------------------------------------------------------------------------------------------------------------------------------------------------------------------------------------------------------------------------------------------------------------------------------------------------------------------------------------------------------------------|
| 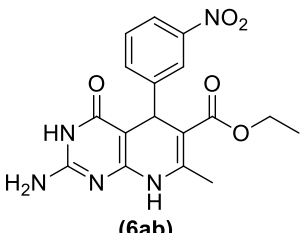 <p style="text-align: center;"><b>(6ab)</b></p> | <p>Yield 0.326 g (88%). Yellow solid mp &gt;300 °C. <sup>1</sup>H NMR (300 MHz, DMSO-<i>d</i><sub>6</sub>): δ(ppm) 1.04-1.08 (t, 3H, <i>J</i> = 7.2 Hz), 2.31 (s, 3H), 3.87-3.94 (m, 2H), 4.93 (s, 1H), 6.56 (s, 2H), 7.47-7.52 (m, 1H), 7.59 (d, 1H, <i>J</i> = 7.5 Hz), 7.95-7.99 (m, 2H), 9.22 (s, 1H), 10.87 (s, 1H); <sup>13</sup>C (100 MHz, DMSO-<i>d</i><sub>6</sub>): δ(ppm) 13.9, 18.4, 58.9, 90.0, 99.9, 120.7, 121.7, 129.3, 134.1, 147.2, 148.3, 150.2, 153.9, 154.6, 161.8, 166.4; IR (KBr) (<i>v</i><sub>max</sub>/ cm<sup>-1</sup>) 3321, 3235, 3112, 2985, 2923, 1644, 1631, 1564, 1280; MS (ESI) <i>m/z</i> calcd for C<sub>17</sub>H<sub>17</sub>N<sub>5</sub>O<sub>5</sub>: 371.12; found 371.9 [M + H]<sup>+</sup>, 393.9 [M + Na]<sup>+</sup>; anal. calcd for C<sub>17</sub>H<sub>17</sub>N<sub>5</sub>O<sub>5</sub>: C, 54.98; H, 4.61; N, 18.86. Found C, 55.09; H, 4.74; N, 18.52%.</p> |
|------------------------------------------------------------------------------------------------------------------------------------|-------------------------------------------------------------------------------------------------------------------------------------------------------------------------------------------------------------------------------------------------------------------------------------------------------------------------------------------------------------------------------------------------------------------------------------------------------------------------------------------------------------------------------------------------------------------------------------------------------------------------------------------------------------------------------------------------------------------------------------------------------------------------------------------------------------------------------------------------------------------------------------------------------------------|

Ethyl 2-amino-7-methyl-4-oxo-5-(*p*-tolyl)-3,4,5,8-tetrahydropyrido[2,3-*d*]pyrimidine-6-carboxylate (**6ac**)

|                                                                                                                                     |                                                                                                                                                                                                                                                                                                                                                                                                                                                                                                                                                                                                                                                                                                                                                                                                                                                                                      |
|-------------------------------------------------------------------------------------------------------------------------------------|--------------------------------------------------------------------------------------------------------------------------------------------------------------------------------------------------------------------------------------------------------------------------------------------------------------------------------------------------------------------------------------------------------------------------------------------------------------------------------------------------------------------------------------------------------------------------------------------------------------------------------------------------------------------------------------------------------------------------------------------------------------------------------------------------------------------------------------------------------------------------------------|
| 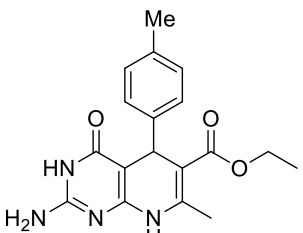 <p style="text-align: center;"><b>(6ac)</b></p> | <p>Yield 0.275 g (81%). White solid mp &gt;300 °C. <sup>1</sup>H NMR (300 MHz, DMSO-<i>d</i><sub>6</sub>): δ(ppm) 1.07-1.11 (t, 3H, <i>J</i> = 7.2 Hz), 2.17 (s, 3H), 2.26 (s, 3H), 3.87-3.97 (m, 2H), 4.78 (s, 1H), 6.46 (s, 2H), 6.93 (d, 2H, <i>J</i> = 7.8 Hz), 7.02 (d, 2H, <i>J</i> = 7.02), 8.99 (s, 1H), 10.79 (s, 1H); <sup>13</sup>C (100 MHz, DMSO-<i>d</i><sub>6</sub>): δ(ppm) 14.1, 18.3, 20.5, 58.7, 91.0, 101.1, 127.0, 128.1, 134.3, 145.2, 146.9, 153.8, 154.2, 161.7, 166.8; IR (KBr) (<i>v</i><sub>max</sub>/ cm<sup>-1</sup>) 3302, 3119, 3103, 2981, 2922, 1660, 1622, 1597, 1284; MS (ESI) <i>m/z</i> calcd for C<sub>18</sub>H<sub>20</sub>N<sub>4</sub>O<sub>3</sub>: 340.15; found 341.0 [M + H]<sup>+</sup>; anal. calcd for C<sub>18</sub>H<sub>20</sub>N<sub>4</sub>O<sub>3</sub>: C, 63.52; H, 5.92; N, 16.46. Found C, 63.39; H, 6.07; N, 16.28%.</p> |
|-------------------------------------------------------------------------------------------------------------------------------------|--------------------------------------------------------------------------------------------------------------------------------------------------------------------------------------------------------------------------------------------------------------------------------------------------------------------------------------------------------------------------------------------------------------------------------------------------------------------------------------------------------------------------------------------------------------------------------------------------------------------------------------------------------------------------------------------------------------------------------------------------------------------------------------------------------------------------------------------------------------------------------------|

Ethyl 2-amino-5-(2,5-dimethoxyphenyl)-7-methyl-4-oxo-3,4,5,8-tetrahydropyrido[2,3-*d*]pyrimidine-6-carboxylate (**6ad**)

|                                                                                                                                   |                                                                                                                                                                                                                                                                                                                                                                                                                                                                                                                                                                                                                                                                                                                                                                                                                                                                                                   |
|-----------------------------------------------------------------------------------------------------------------------------------|---------------------------------------------------------------------------------------------------------------------------------------------------------------------------------------------------------------------------------------------------------------------------------------------------------------------------------------------------------------------------------------------------------------------------------------------------------------------------------------------------------------------------------------------------------------------------------------------------------------------------------------------------------------------------------------------------------------------------------------------------------------------------------------------------------------------------------------------------------------------------------------------------|
| 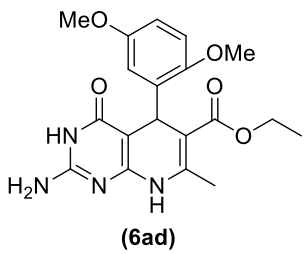 <p style="text-align: center;"><b>(6ad)</b></p> | <p>Yield 0.294 g (80%). White solid mp 175-176 °C. <sup>1</sup>H NMR (300 MHz, DMSO-<i>d</i><sub>6</sub>): δ(ppm) 1.06-1.11 (t, 3H, <i>J</i> = 7.2 Hz), 2.17 (s, 3H), 3.59 (s, 3H), 3.60 (s, 3H), 3.85-3.89 (m, 2H), 4.95 (s, 1H), 6.56 (s, 2H), 6.58-6.62 (m, 2H), 6.72-6.75 (m, 1H), 8.89 (s, 1H), 10.96 (s, 1H); <sup>13</sup>C (100 MHz, DMSO-<i>d</i><sub>6</sub>) δ(ppm) 14.1, 18.2, 33.5, 55.1, 56.3, 58.6, 90.0, 100.5, 110.4, 112.6, 116.9, 137.2, 146.2, 151.6, 152.6, 154.0, 154.5, 161.4, 167.2; IR (KBr) (<math>\nu_{\max}</math>/ cm<sup>-1</sup>) 3371, 3319, 3137, 2985, 2933, 1647, 1631, 1519, 1215; MS (ESI) <i>m/z</i> calcd for C<sub>19</sub>H<sub>22</sub>N<sub>4</sub>O<sub>5</sub>: 386.16; found 387.0 [M + H]<sup>+</sup>; anal. calcd for C<sub>19</sub>H<sub>22</sub>N<sub>4</sub>O<sub>5</sub>: C, 59.06; H, 5.74; N, 14.50. Found C, 59.19; H, 5.92; N, 14.34%</p> |
|-----------------------------------------------------------------------------------------------------------------------------------|---------------------------------------------------------------------------------------------------------------------------------------------------------------------------------------------------------------------------------------------------------------------------------------------------------------------------------------------------------------------------------------------------------------------------------------------------------------------------------------------------------------------------------------------------------------------------------------------------------------------------------------------------------------------------------------------------------------------------------------------------------------------------------------------------------------------------------------------------------------------------------------------------|

Ethyl 2-amino-5-benzyl-7-methyl-4-oxo-3,4,5,8-tetrahydropyrido[2,3-*d*]pyrimidine-6-carboxylate (**6ae**)

|                                                                                                                                    |                                                                                                                                                                                                                                                                                                                                                                                                                                                                                                                                                                                                                                                                                                                                                                                                                                                                                                              |
|------------------------------------------------------------------------------------------------------------------------------------|--------------------------------------------------------------------------------------------------------------------------------------------------------------------------------------------------------------------------------------------------------------------------------------------------------------------------------------------------------------------------------------------------------------------------------------------------------------------------------------------------------------------------------------------------------------------------------------------------------------------------------------------------------------------------------------------------------------------------------------------------------------------------------------------------------------------------------------------------------------------------------------------------------------|
| 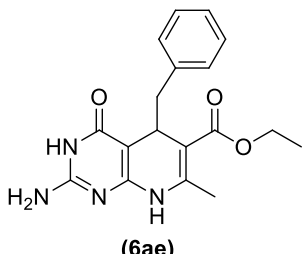 <p style="text-align: center;"><b>(6ae)</b></p> | <p>Yield, 0.278 g (82%). White solid mp &gt;300 °C. <sup>1</sup>H NMR (300 MHz, DMSO-<i>d</i><sub>6</sub>): δ(ppm) 1.09-1.14 (t, 3H, <i>J</i> = 6.9 Hz), 2.02 (s, 3H), 2.54-2.55 (m, 2H), 3.82-3.97 (m, 2H), 4.07-4.10 (m, 1H), 6.60 (s, 2H), 6.77-6.80 (m, 2H), 7.07-7.10 (m, 3H); 8.36 (s, 1H), 11.21 (s, 1H); <sup>13</sup>C (100 MHz, DMSO-<i>d</i><sub>6</sub>) δ(ppm) 14.2, 18.1, 32.5, 40.5, 58.5, 88.5, 98.5, 125.3, 127.0, 129.6, 139.0, 148.1, 154.2, 155.0, 162.0, 167.0; IR (KBr) (<math>\nu_{\max}</math>/ cm<sup>-1</sup>) 3381, 3315, 3186, 2980, 2924, 2750, 1656, 1598, 1523, 1234; MS (ESI) <i>m/z</i> calcd for C<sub>18</sub>H<sub>20</sub>N<sub>4</sub>O<sub>3</sub>: 340.15; found 341.0 [M + H]<sup>+</sup>, 363.1 [M + Na]<sup>+</sup>; anal. calcd for C<sub>18</sub>H<sub>20</sub>N<sub>4</sub>O<sub>3</sub>: C, 63.52; H, 5.92; N, 16.46. Found C, 63.34; H, 5.79; N, 16.63%.</p> |
|------------------------------------------------------------------------------------------------------------------------------------|--------------------------------------------------------------------------------------------------------------------------------------------------------------------------------------------------------------------------------------------------------------------------------------------------------------------------------------------------------------------------------------------------------------------------------------------------------------------------------------------------------------------------------------------------------------------------------------------------------------------------------------------------------------------------------------------------------------------------------------------------------------------------------------------------------------------------------------------------------------------------------------------------------------|

Methyl 2-amino-5-(2-bromophenyl)-7-methyl-4-oxo-3,4,5,8-tetrahydropyrido[2,3-*d*]pyrimidine-6-carboxylate (**6bf**)

|                                                                                                                                     |                                                                                                                                                                                                                                                                                                                                                                                                                                                                                                                                                                                                                                                                                                                                                                                                                                                         |
|-------------------------------------------------------------------------------------------------------------------------------------|---------------------------------------------------------------------------------------------------------------------------------------------------------------------------------------------------------------------------------------------------------------------------------------------------------------------------------------------------------------------------------------------------------------------------------------------------------------------------------------------------------------------------------------------------------------------------------------------------------------------------------------------------------------------------------------------------------------------------------------------------------------------------------------------------------------------------------------------------------|
| 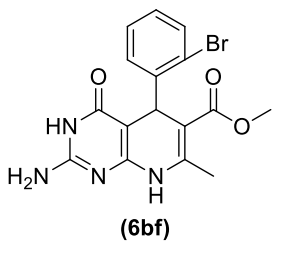 <p style="text-align: center;"><b>(6bf)</b></p> | <p>Yield, 0.323 g (83%). White solid mp &gt; 300 °C. <sup>1</sup>H NMR (300 MHz, DMSO-<i>d</i><sub>6</sub>): δ(ppm) 2.23 (s, 3H), 3.42 (s, 3H), 5.13 (s, 1H), 6.80 (s, 2H), 6.93-6.98 (m, 1H), 7.16-7.24 (m, 2H), 7.34-7.37 (m, 1H), 9.05 (s, 1H), 11.37 (s, 1H); <sup>13</sup>C (150 MHz, DMSO-<i>d</i><sub>6</sub>) δ(ppm) 18.3, 37.3, 50.2, 91.2, 101.0, 122.4, 127.2, 127.5, 131.1, 132.0, 147.2, 148.0, 153.8, 167.3, 175.1; IR (KBr) (<math>\nu_{\max}</math>/ cm<sup>-1</sup>) 3378, 3317, 3176, 2978, 2932, 1644, 1632, 1528, 1219; MS (ESI) <i>m/z</i> calcd for C<sub>16</sub>H<sub>15</sub>BrN<sub>4</sub>O<sub>3</sub>: 390.03; found 390.9 [M + H]<sup>+</sup>; 412.9 [M + Na]<sup>+</sup>; anal. calcd for C<sub>16</sub>H<sub>15</sub>BrN<sub>4</sub>O<sub>3</sub>: C, 49.12; H, 3.86; N, 14.32. Found C, 49.30; H, 3.71; N, 14.18%.</p> |
|-------------------------------------------------------------------------------------------------------------------------------------|---------------------------------------------------------------------------------------------------------------------------------------------------------------------------------------------------------------------------------------------------------------------------------------------------------------------------------------------------------------------------------------------------------------------------------------------------------------------------------------------------------------------------------------------------------------------------------------------------------------------------------------------------------------------------------------------------------------------------------------------------------------------------------------------------------------------------------------------------------|

Methyl 2-amino-5-(3-chlorophenyl)-7-methyl-4-oxo-3,4,5,8-tetrahydropyrido[2,3-*d*]pyrimidine-6-carboxylate (**6bg**)

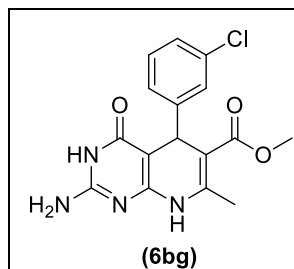

Yield 0.262 g (76%). White solid mp > 300 °C. <sup>1</sup>H NMR (300 MHz, DMSO-*d*<sub>6</sub>): δ(ppm) 2.30 (s, 3H), 3.48 (s, 3H), 4.83 (s, 1H), 6.82 (s, 2H), 7.09-7.23 (m, 4H), 9.11 (s, 1H), 11.54 (s, 1H); <sup>13</sup>C (150 MHz, DMSO-*d*<sub>6</sub>): δ(ppm) 18.6, 24.9, 36.3, 50.6, 90.3, 99.8, 125.5, 125.7, 126.8, 129.7, 132.3, 148.3, 150.6, 154.0, 167.2, 175.5; IR (KBr) (ν<sub>max</sub>/ cm<sup>-1</sup>) 3365, 3315, 3177, 2968, 2930, 1641, 1635, 1519, 1224; MS (ESI) *m/z* calcd for C<sub>16</sub>H<sub>15</sub>ClN<sub>4</sub>O<sub>3</sub>: 346.08; found 347.0 [M + H]<sup>+</sup>, 369.0 [M + Na]<sup>+</sup>; anal. calcd for C<sub>16</sub>H<sub>15</sub>ClN<sub>4</sub>O<sub>3</sub>: C, 55.42; H, 4.36; N, 16.16. Found C, 55.54; H, 4.20; N, 16.01%.

Methyl 2-amino-5-(furan-3-yl)-7-methyl-4-oxo-3,4,5,8-tetrahydropyrido[2,3-*d*]pyrimidine-6-carboxylate (**6bh**)

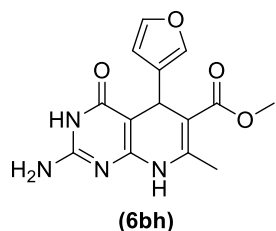

Yield 0.241g (80%). White solid mp > 300 °C. <sup>1</sup>H NMR (300 MHz, DMSO-*d*<sub>6</sub>): δ(ppm) 2.24 (s, 3H), 3.55 (s, 3H), 4.77 (s, 1H), 6.18 (s, 1H), 6.63 (s, 2H), 7.10 (s, 1H), 7.39 (s, 1H), 9.03 (s, 1H), 11.23 (s, 1H); <sup>13</sup>C (150 MHz, DMSO-*d*<sub>6</sub>): δ(ppm) 18.4, 27.0, 50.6, 89.9, 99.6, 110.2, 131.1, 138.0, 142.5, 147.9, 154.2, 154.3, 161.7, 167.3; IR (KBr) (ν<sub>max</sub>/ cm<sup>-1</sup>) 3471, 3431, 3305, 2947, 2924, 1660, 1637, 1516, 1226; MS (ESI) *m/z* calcd for C<sub>14</sub>H<sub>14</sub>N<sub>4</sub>O<sub>4</sub>: 302.10; found 303.0 [M + H]<sup>+</sup>, 325.0 [M + Na]<sup>+</sup>; anal. calcd for C<sub>14</sub>H<sub>14</sub>N<sub>4</sub>O<sub>4</sub>: C, 55.63; H, 4.67; N, 18.53. Found C, 55.50; H, 4.51; N, 18.66%.



# $^1\text{H}$ and $^{13}\text{C}$ NMR spectra

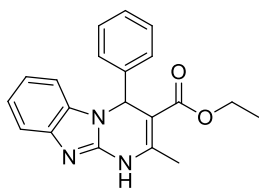

(4aa)  
 $^1\text{H}$  NMR

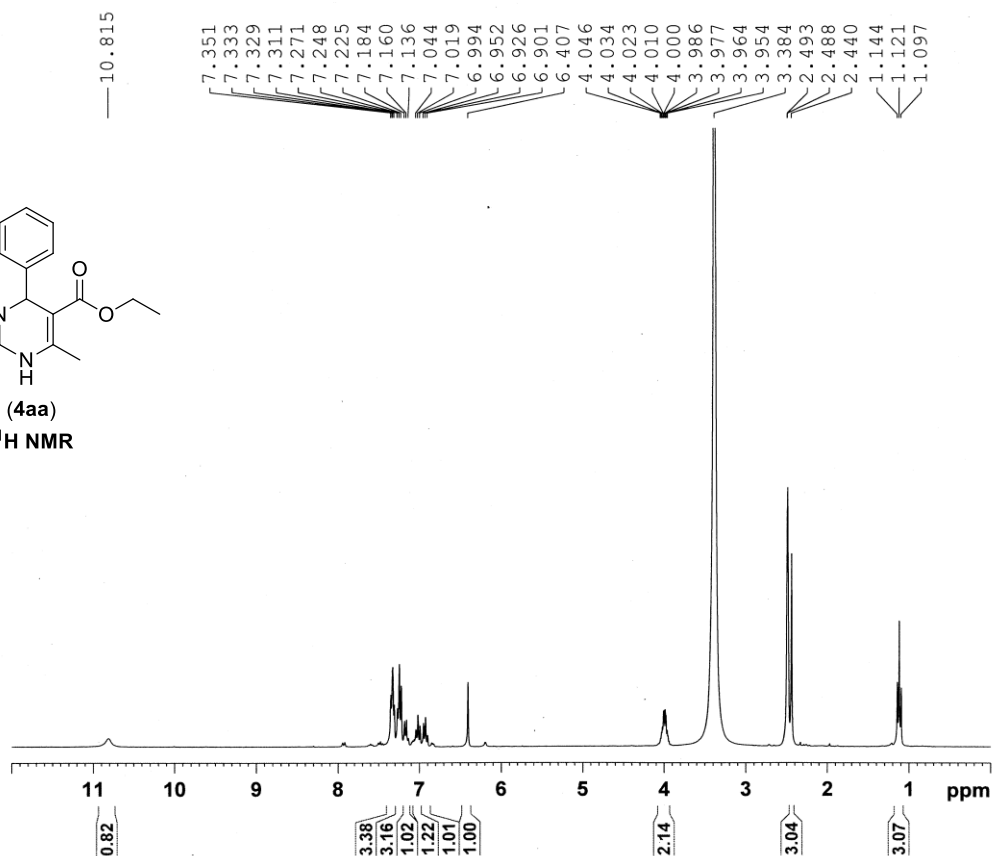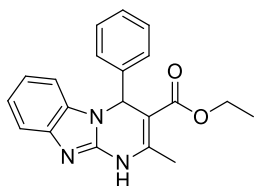

(4aa)  
 $^{13}\text{C}$  NMR

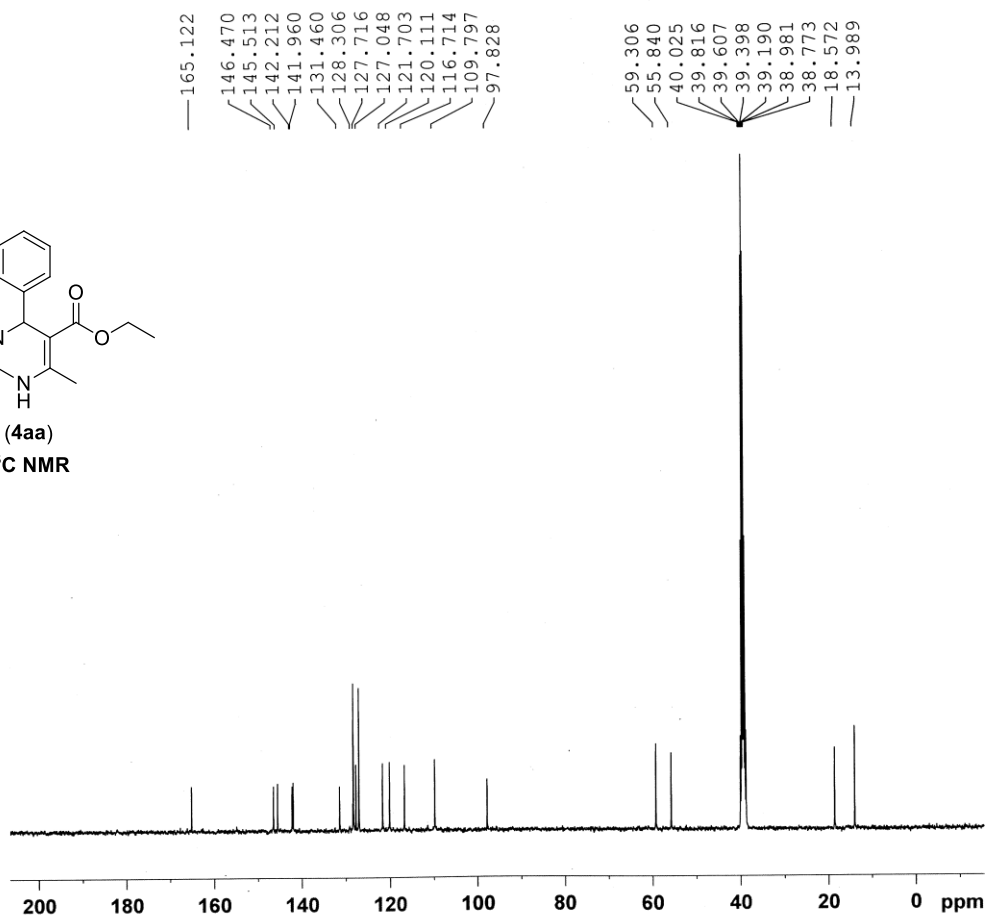

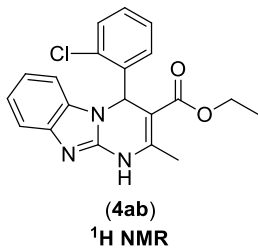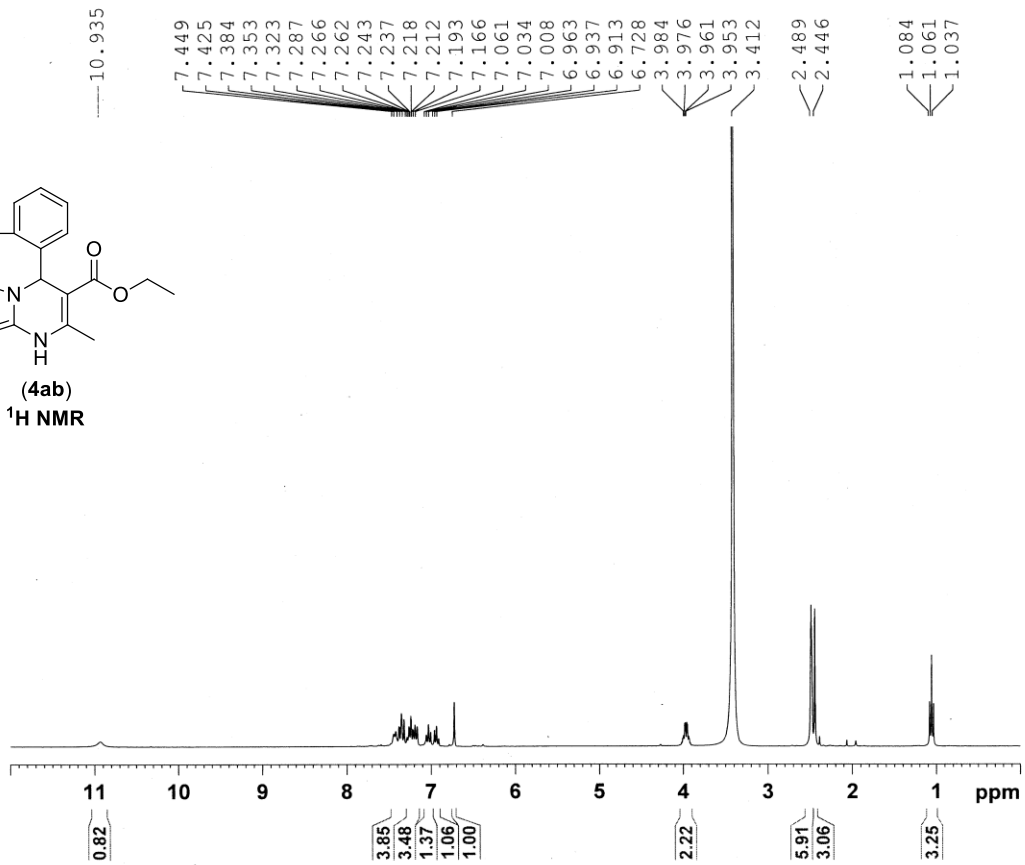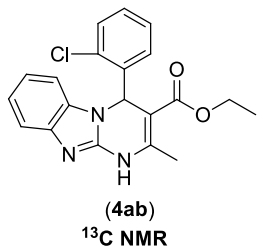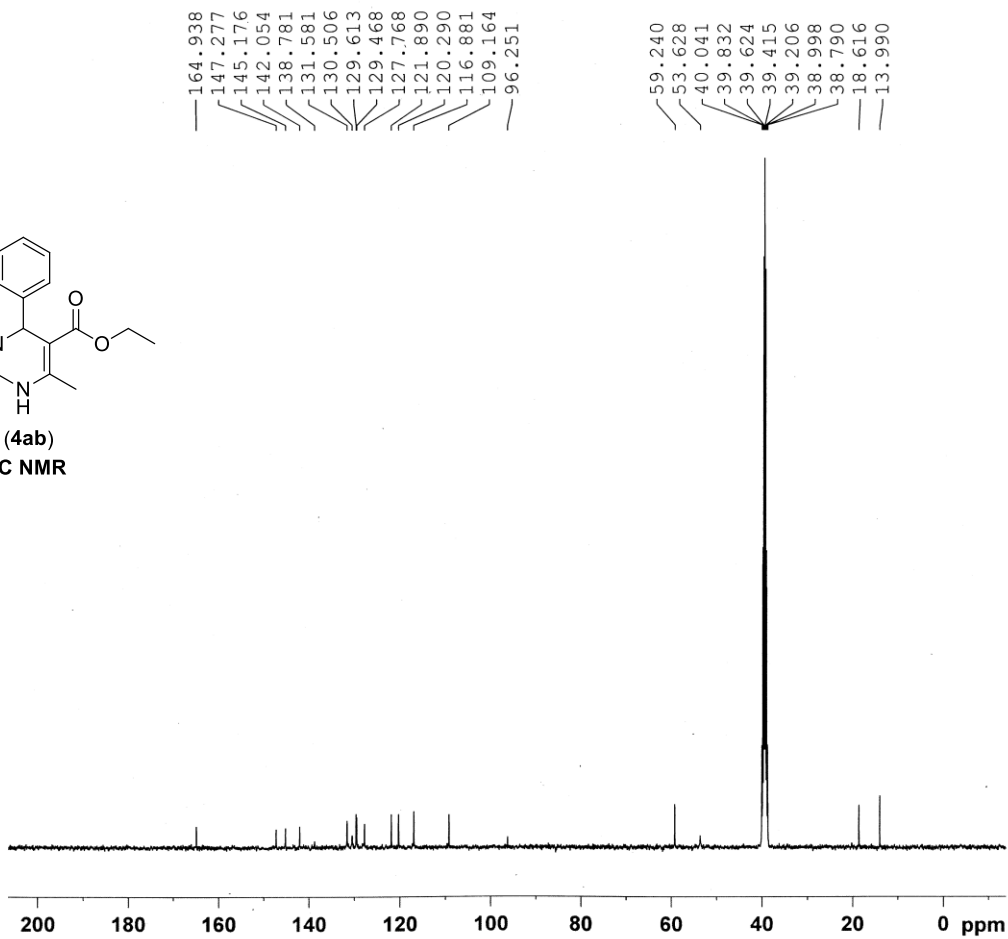

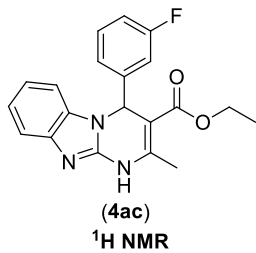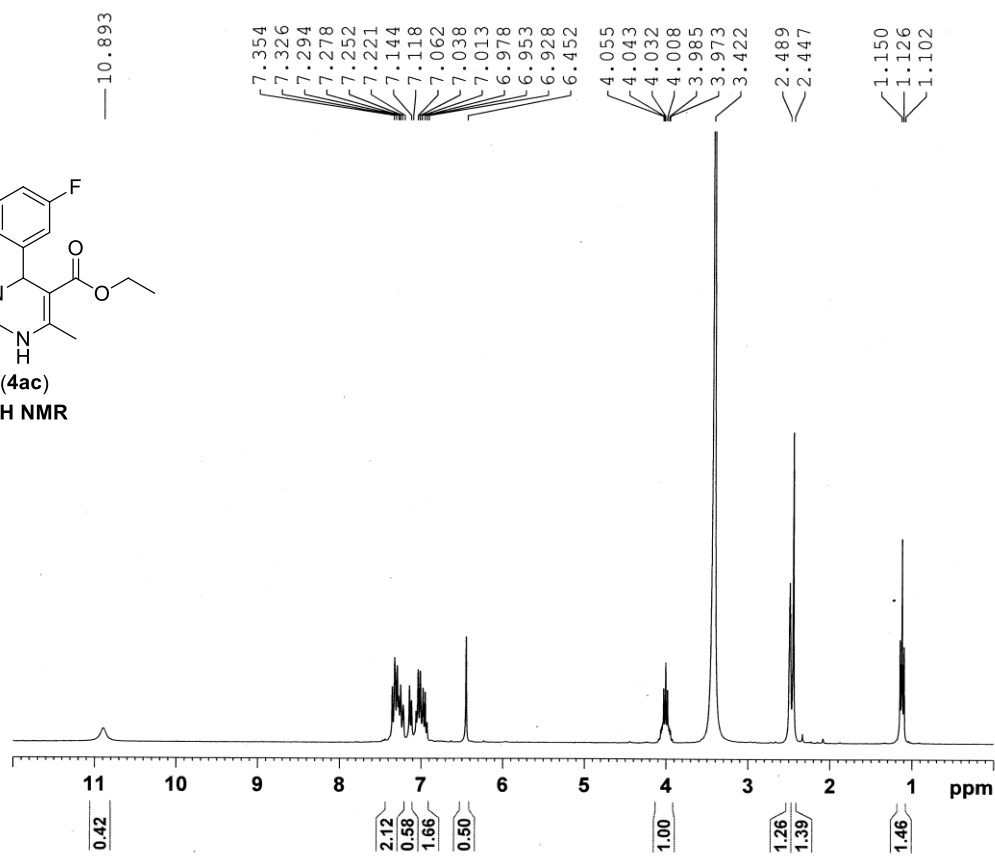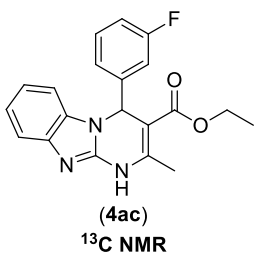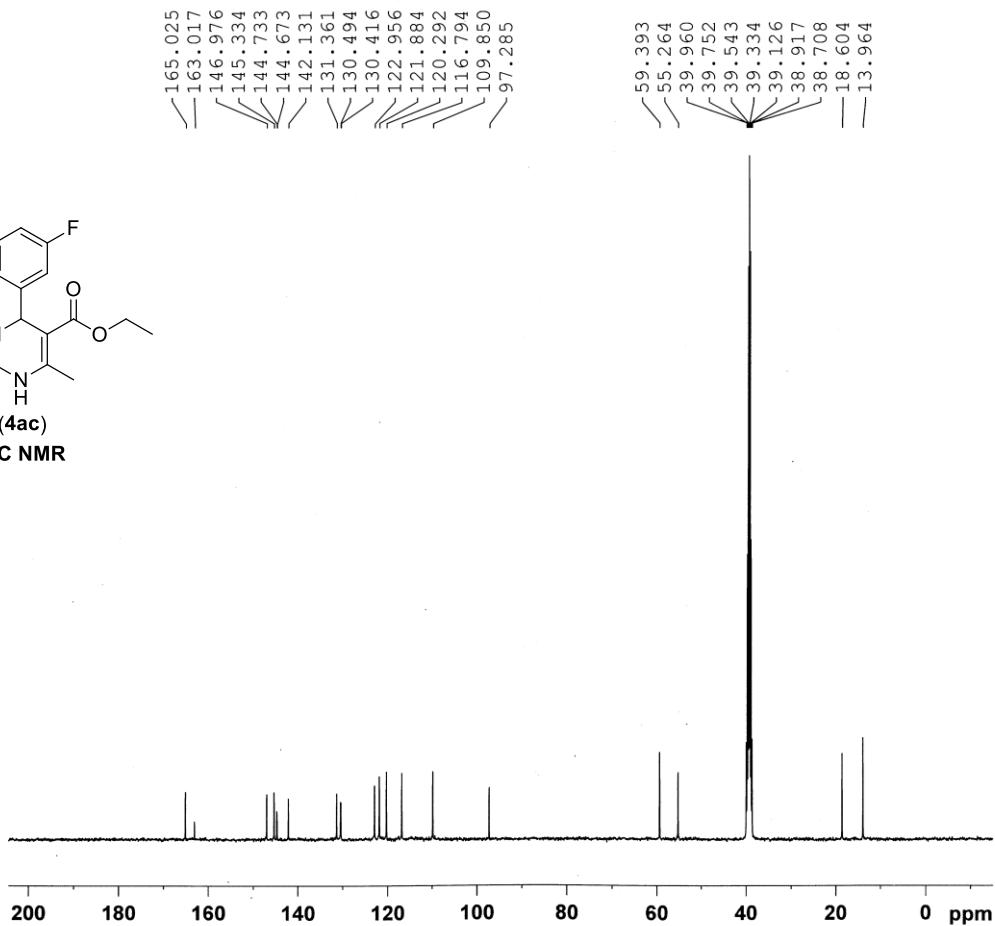

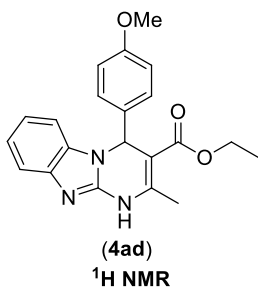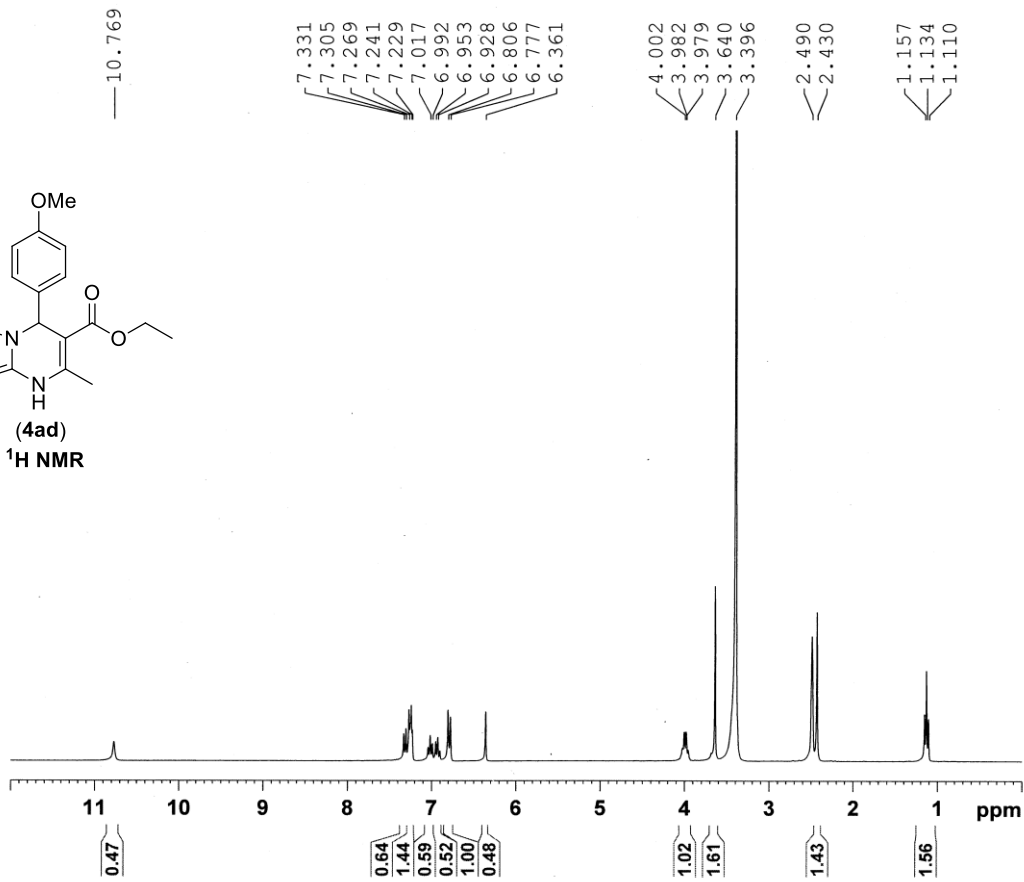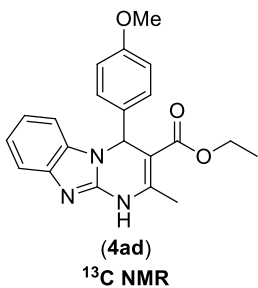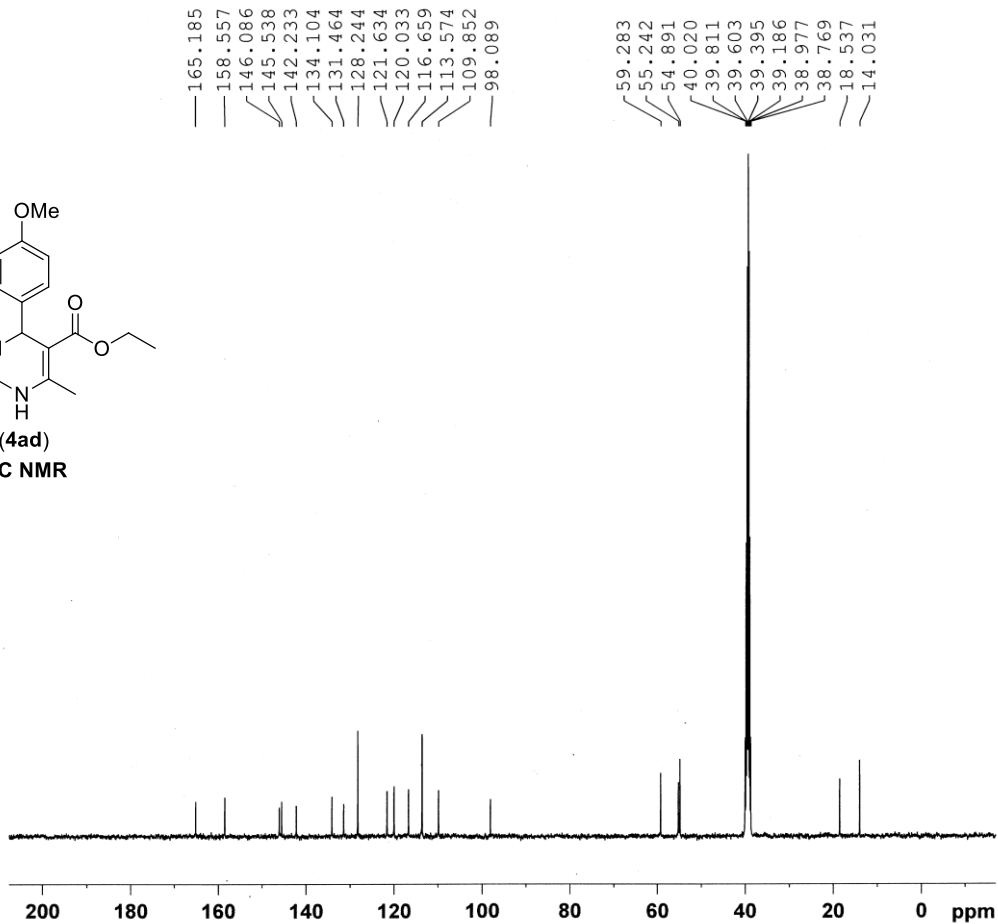

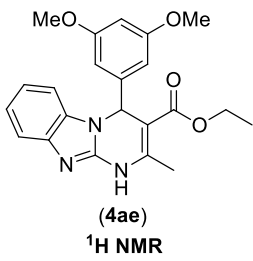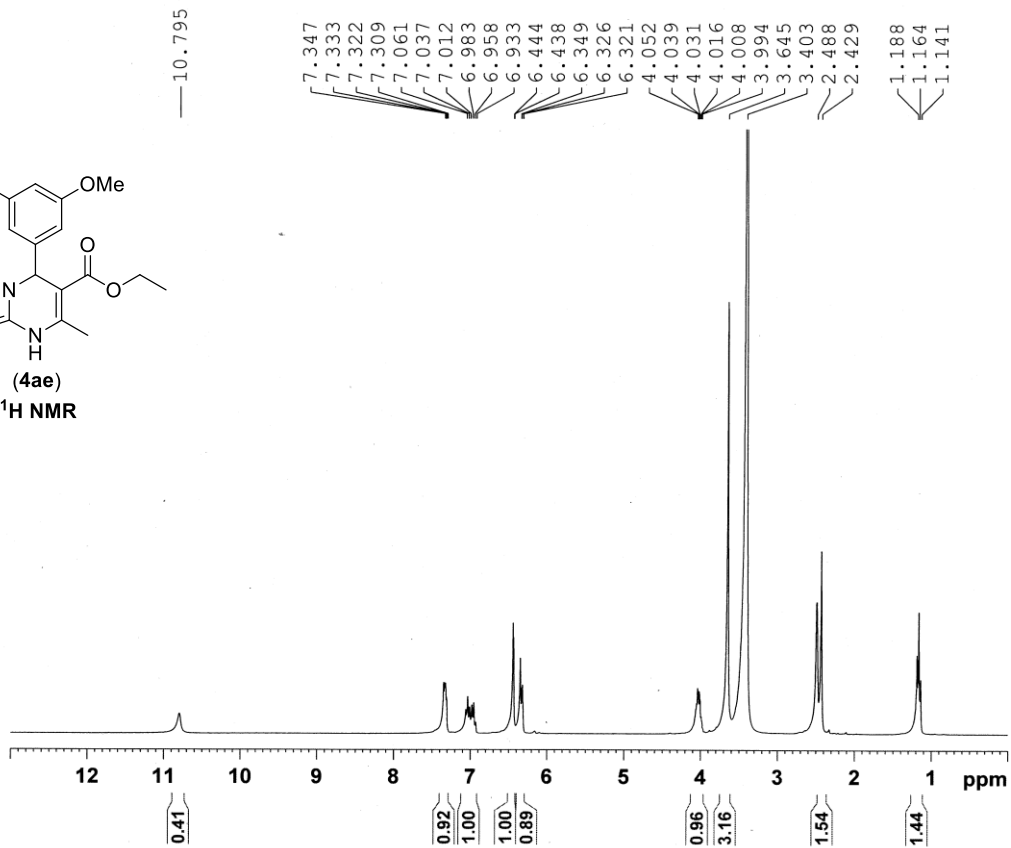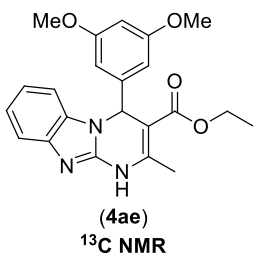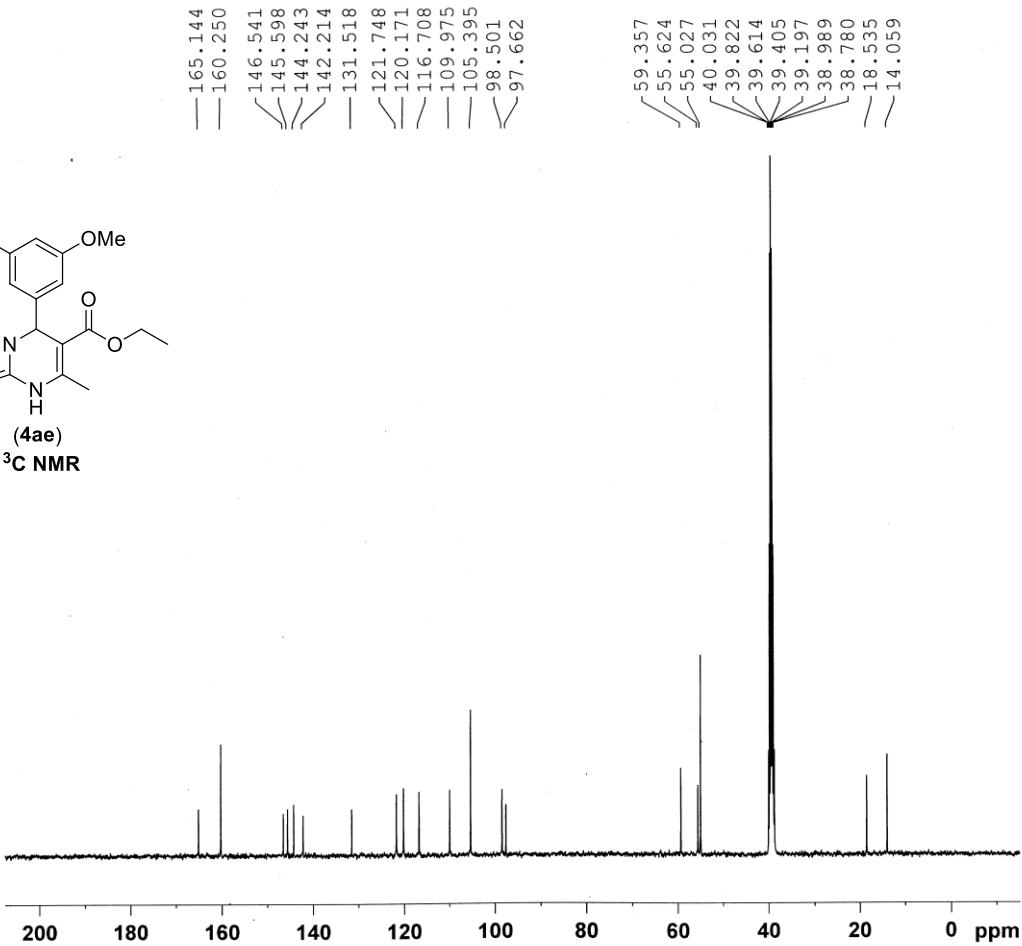

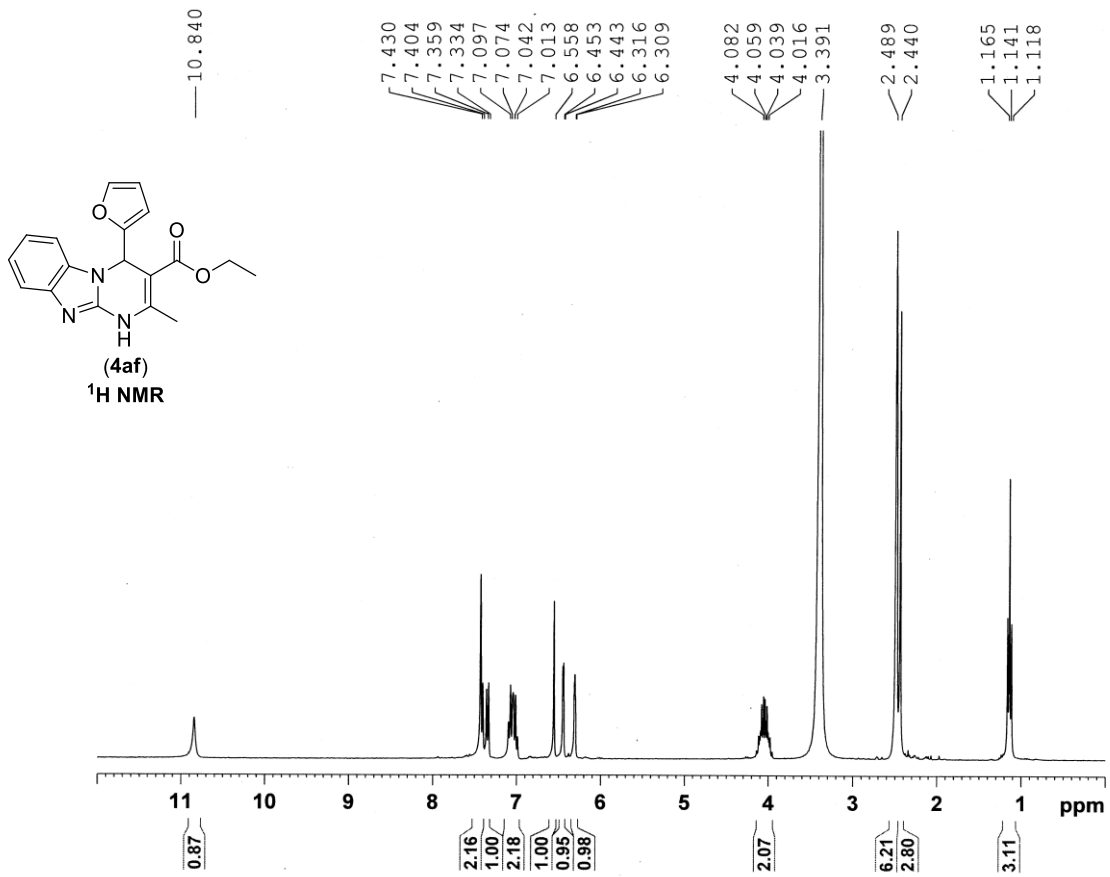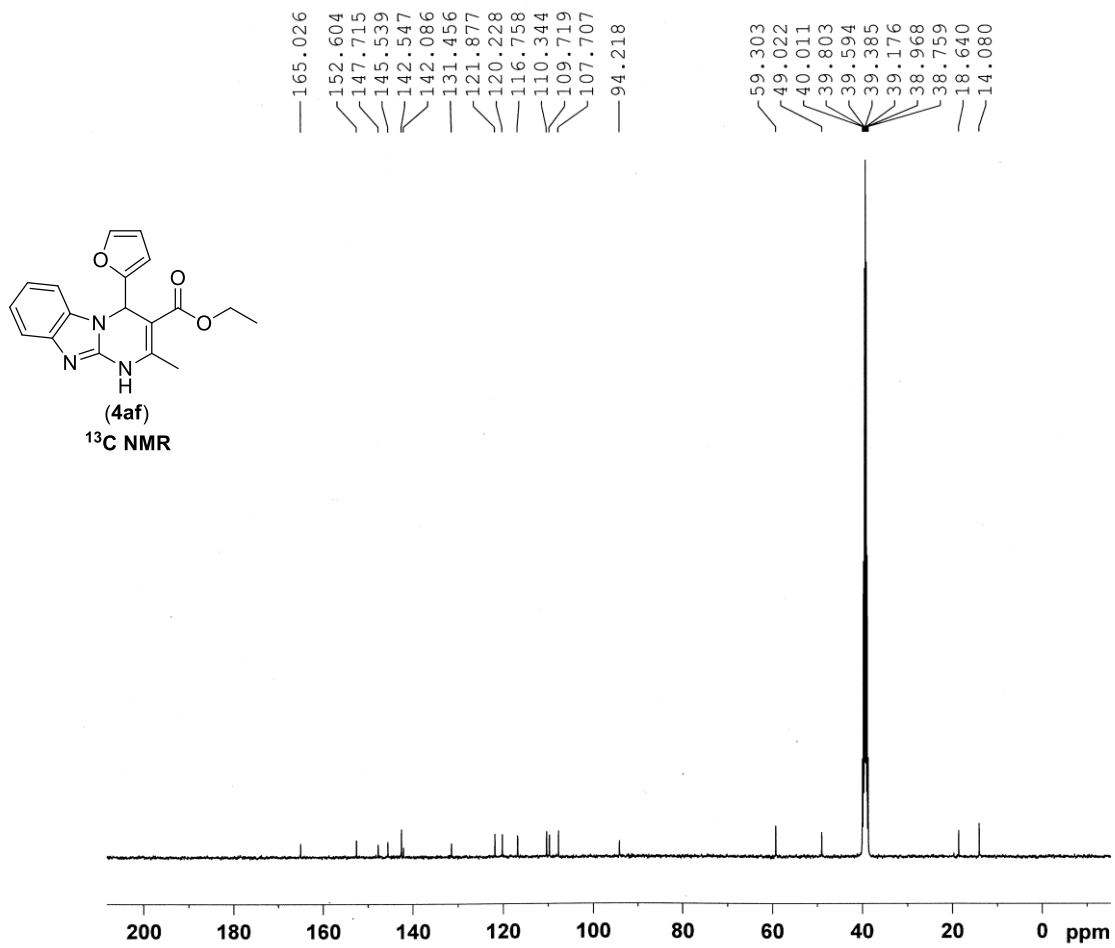

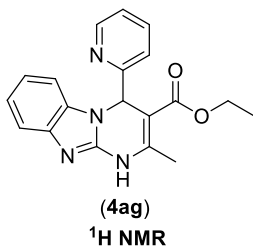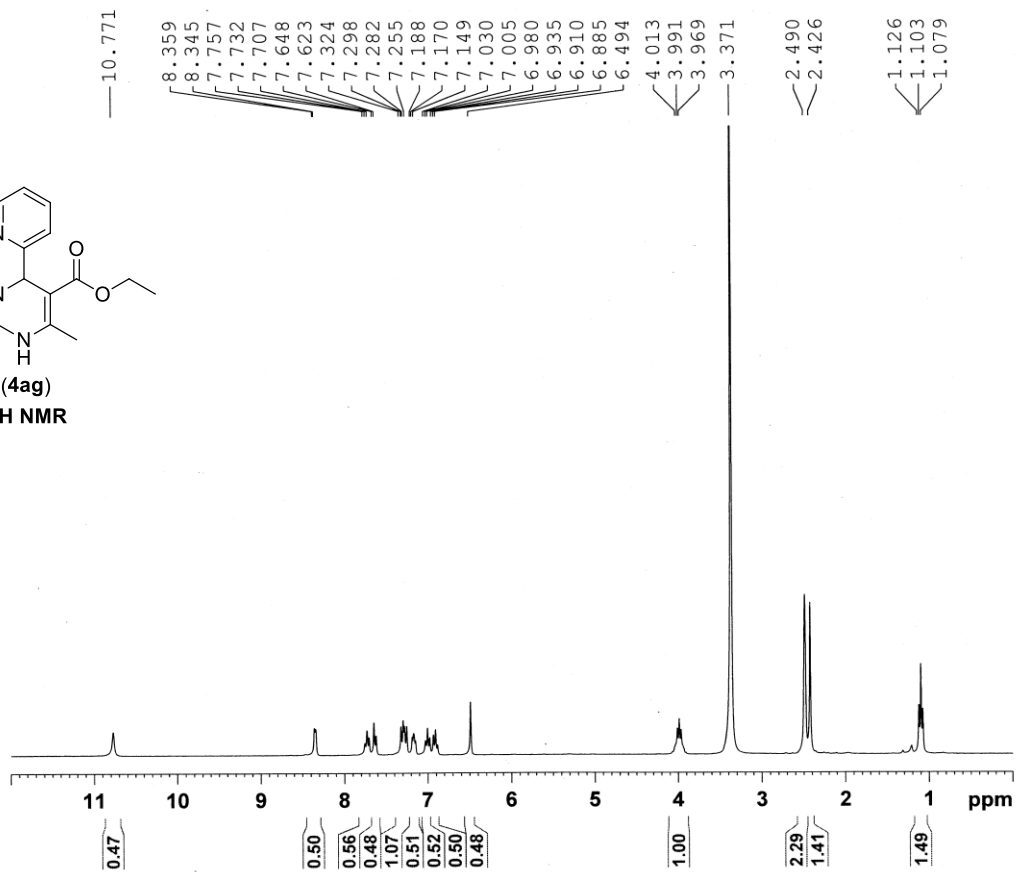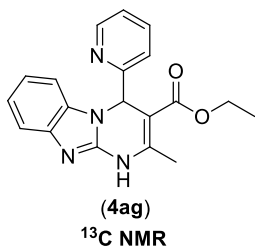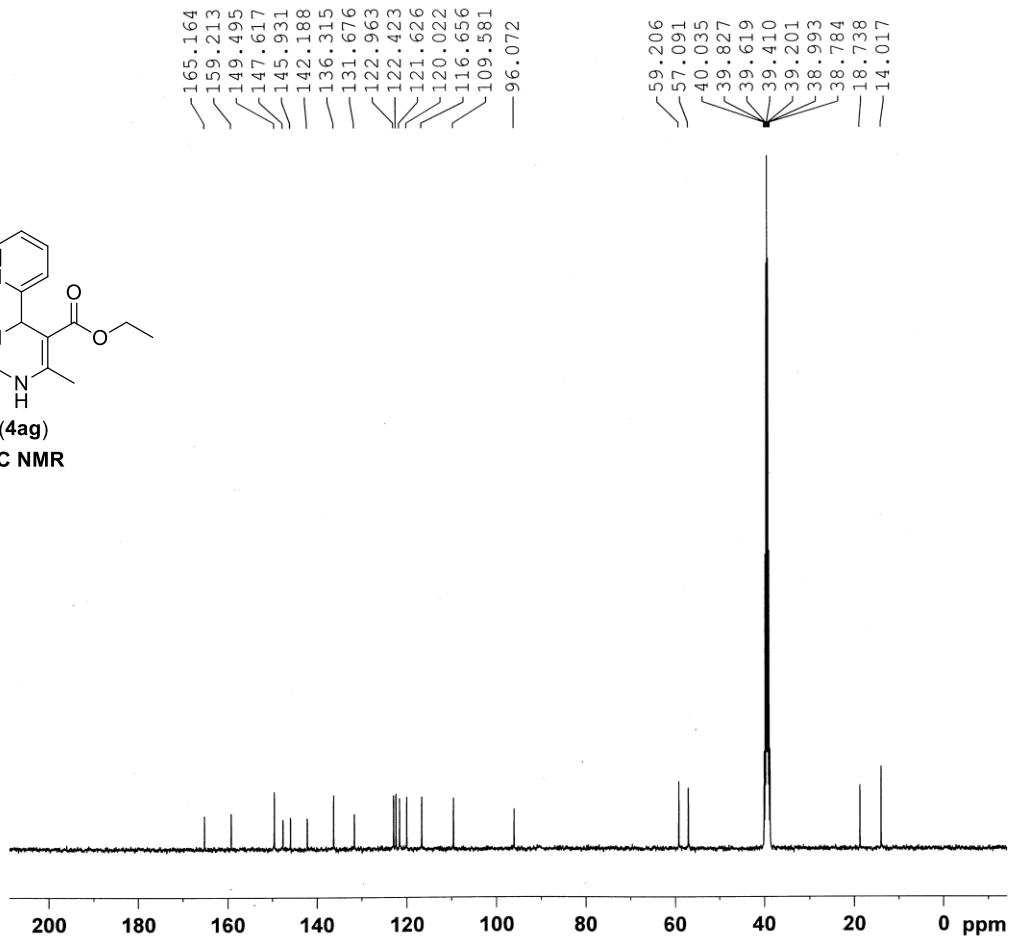

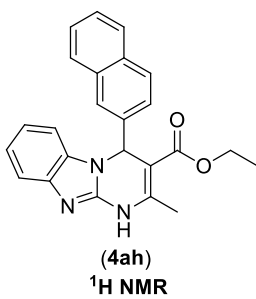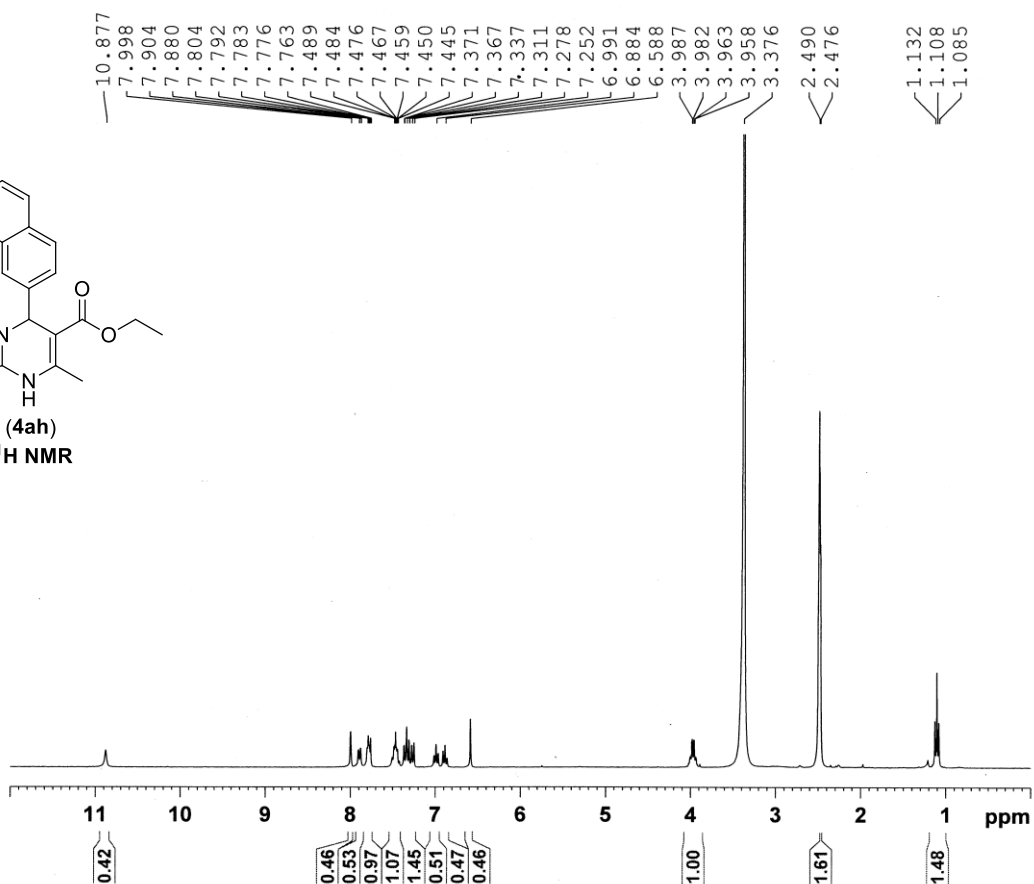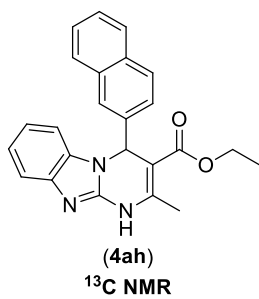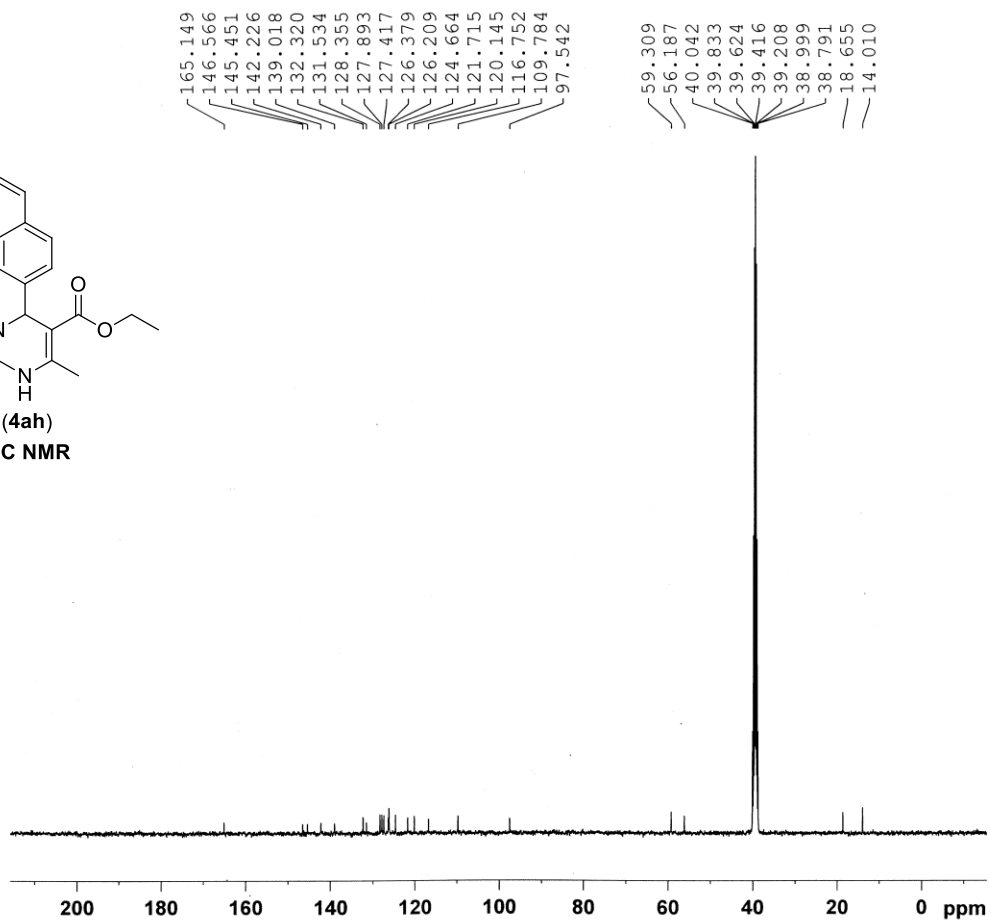



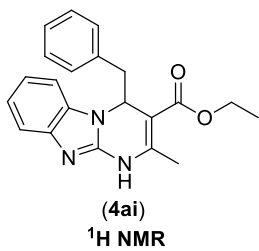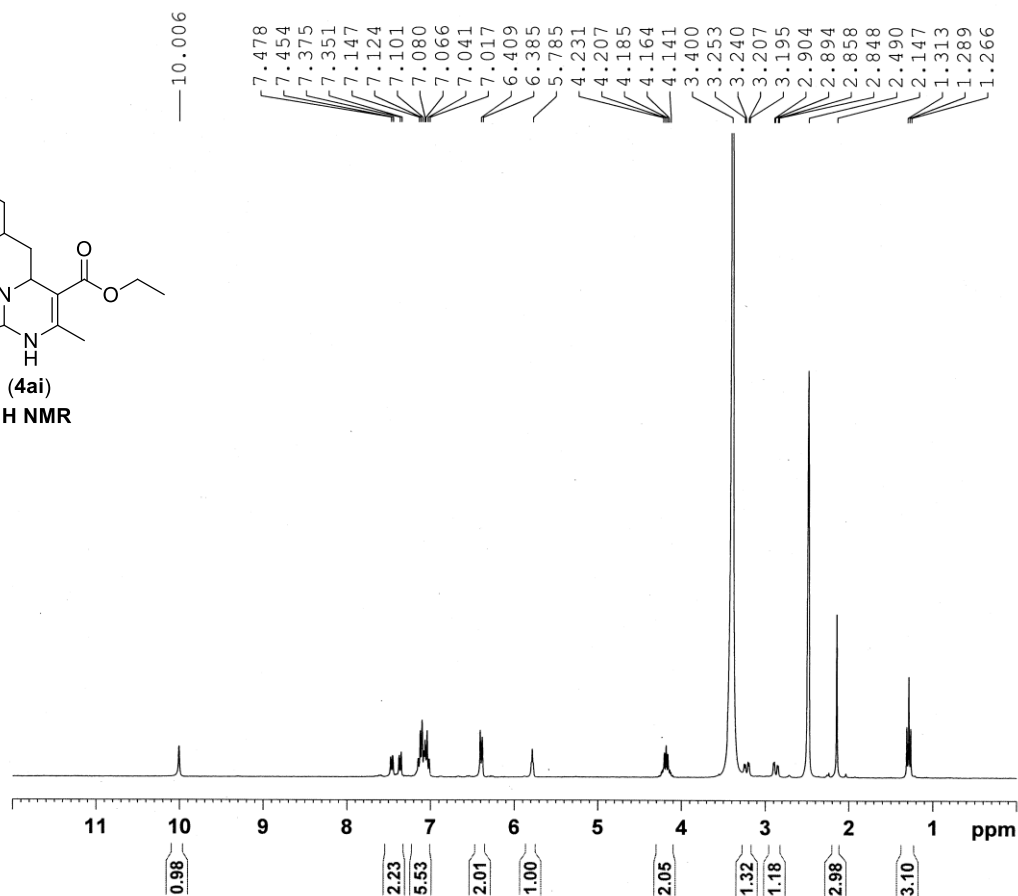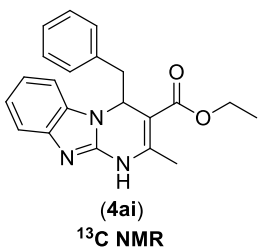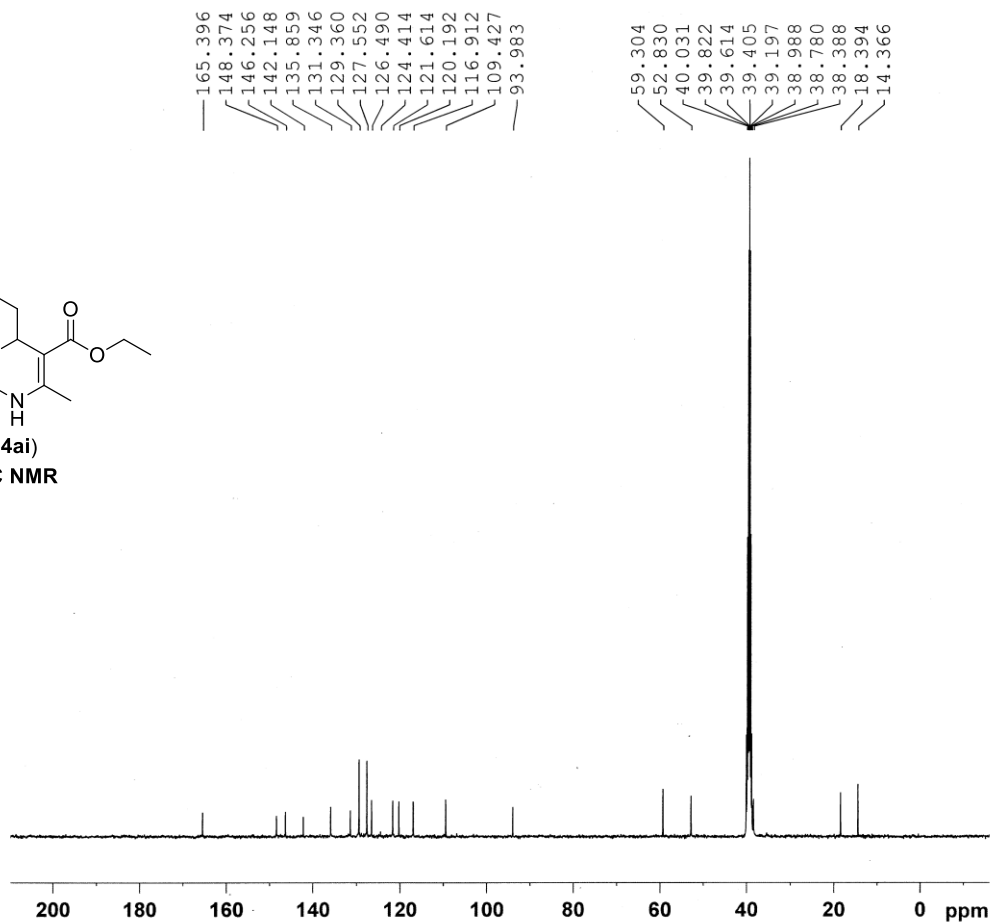

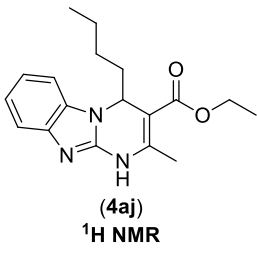

7.091  
 7.072  
 7.063  
 7.052  
 6.846  
 6.835  
 6.827  
 6.816  
 5.572  
 4.181  
 4.158  
 4.137  
 4.114  
 3.521  
 2.489  
 2.370  
 2.199  
 2.175  
 2.150  
 1.453  
 1.265  
 1.241  
 1.218  
 0.865  
 0.841  
 0.817  
 0.683  
 0.660  
 0.636

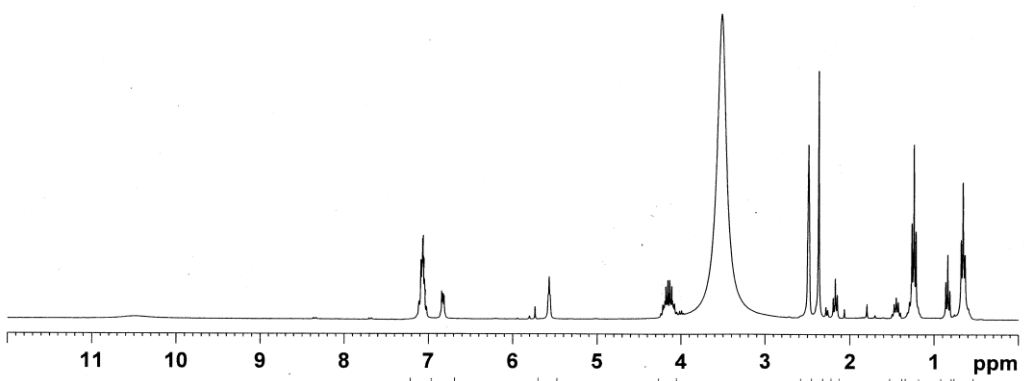

165.482  
 131.375  
 121.581  
 120.190  
 116.804  
 109.292  
 95.657  
 59.318  
 51.542  
 39.972  
 39.765  
 39.557  
 39.348  
 39.139  
 38.930  
 38.721  
 33.389  
 24.857  
 21.852  
 18.606  
 14.248  
 13.769

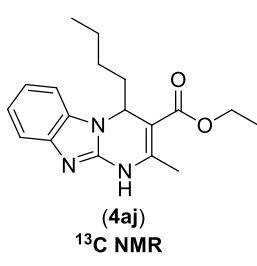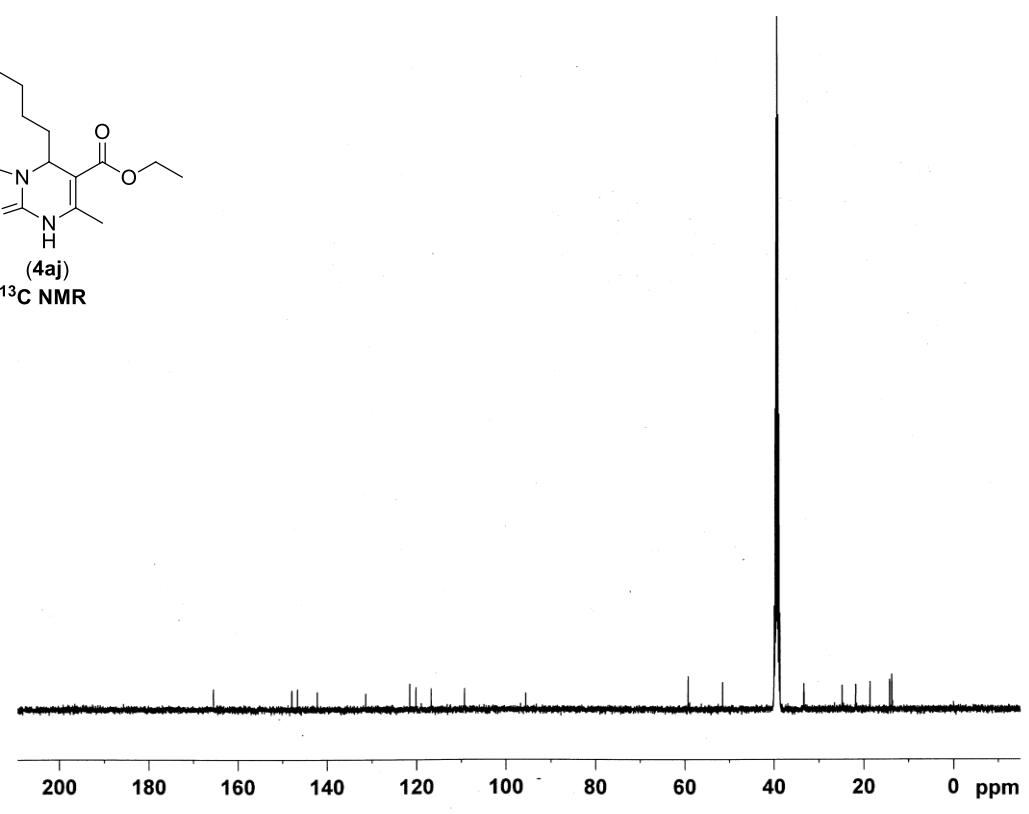

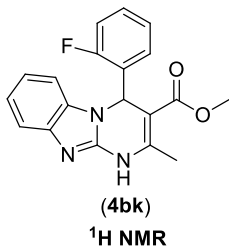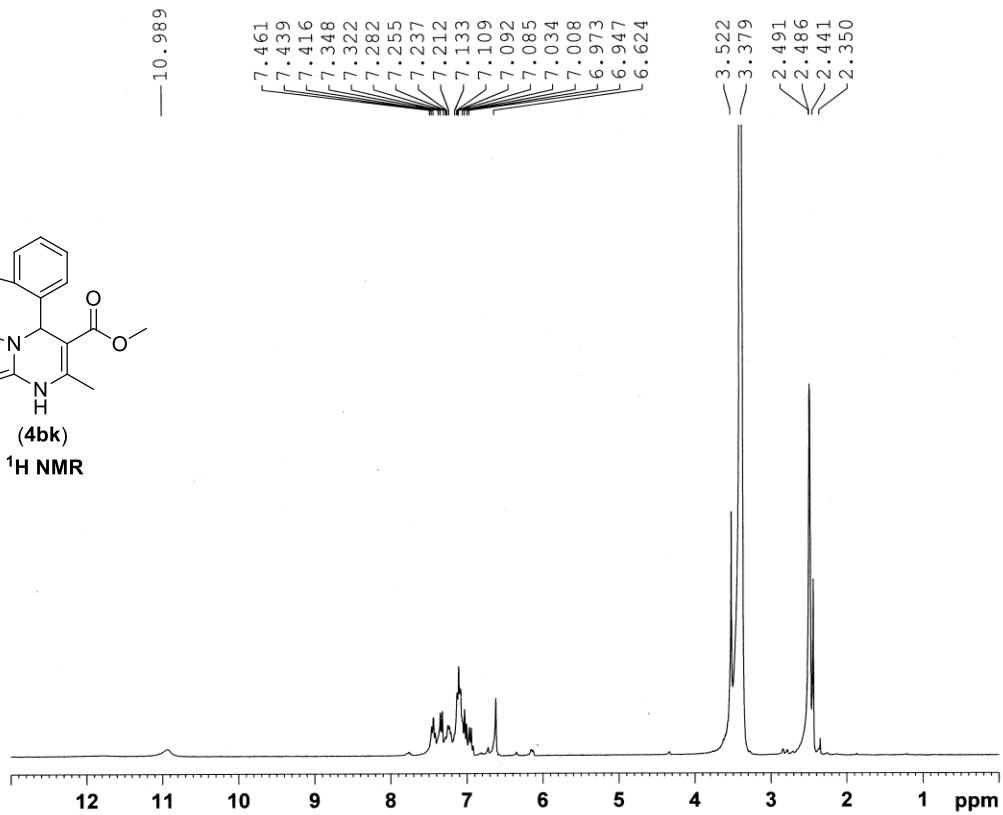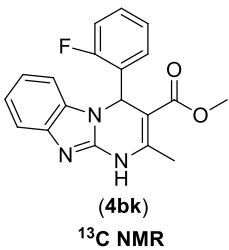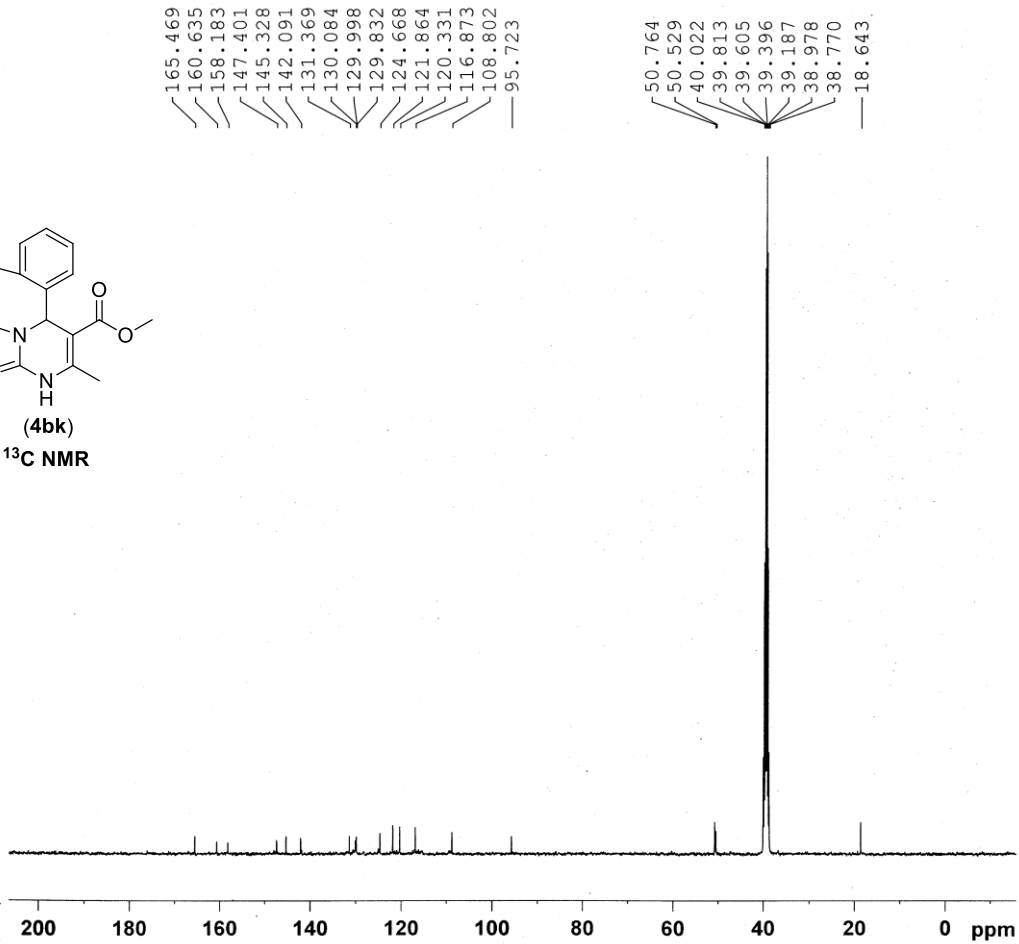

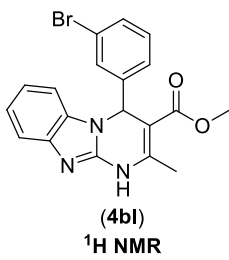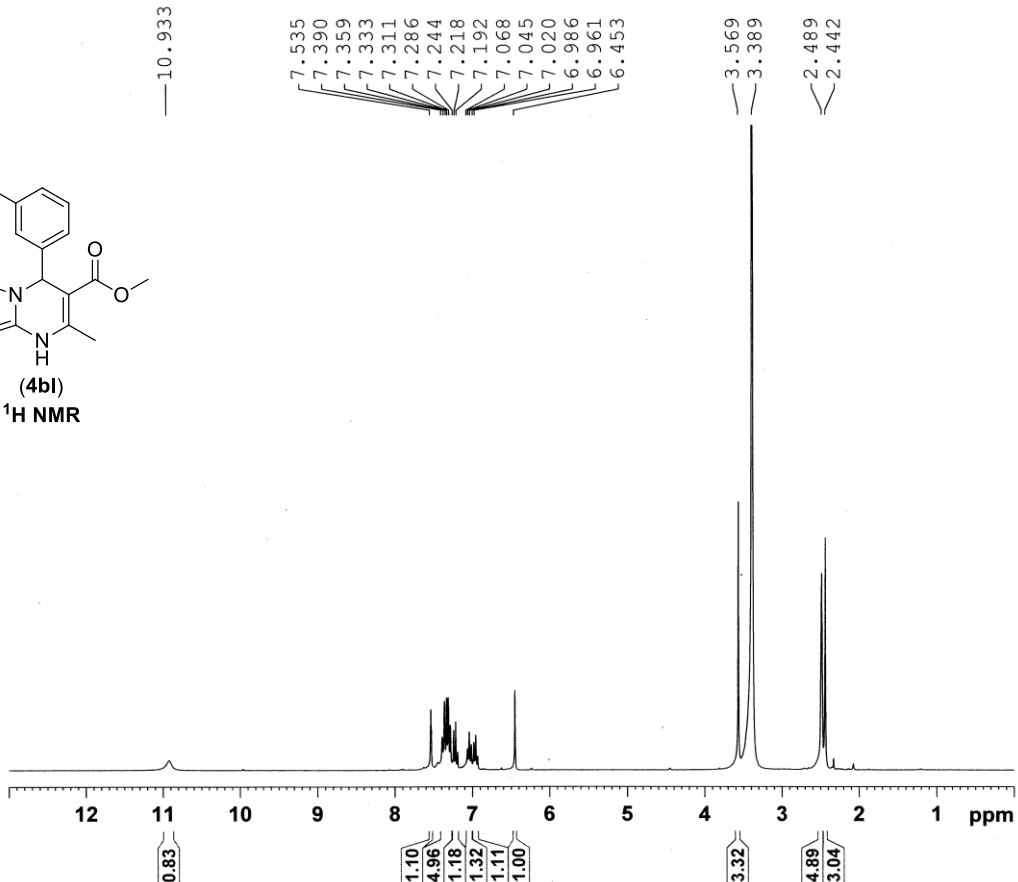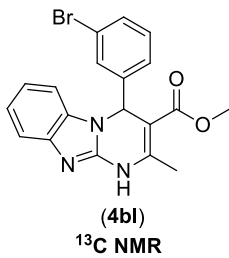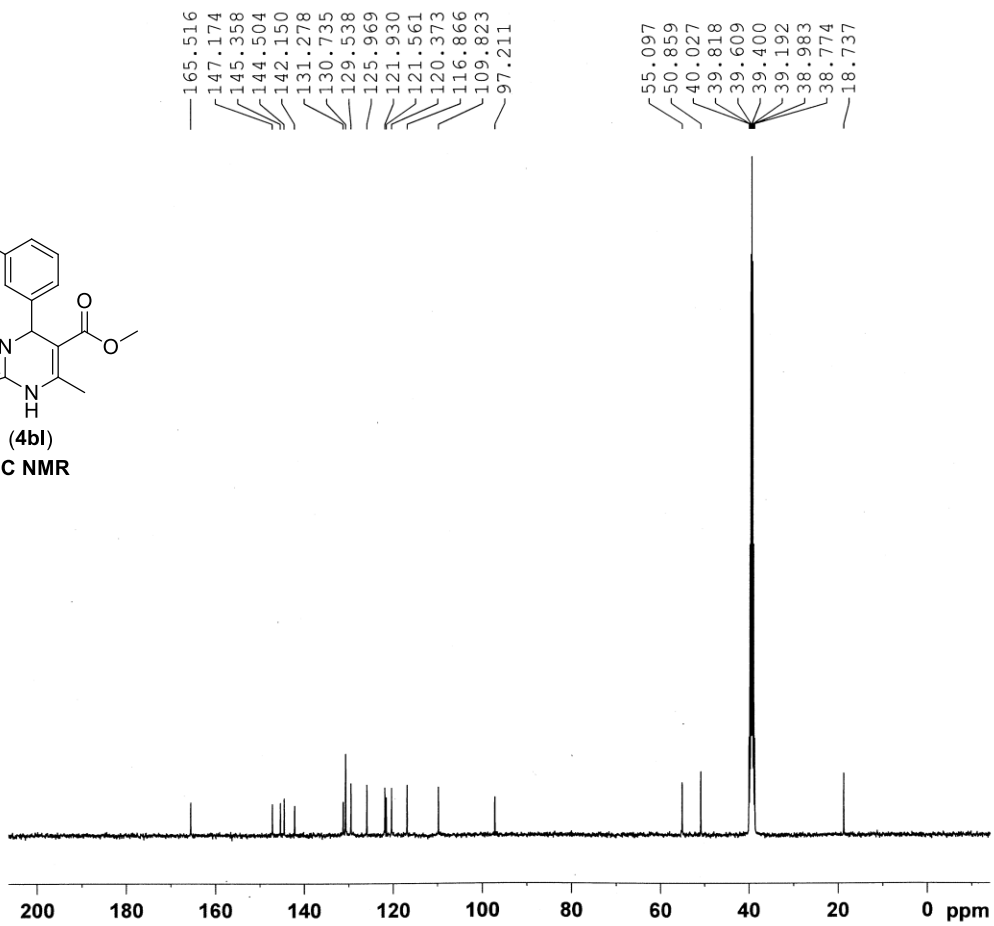

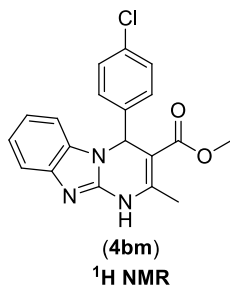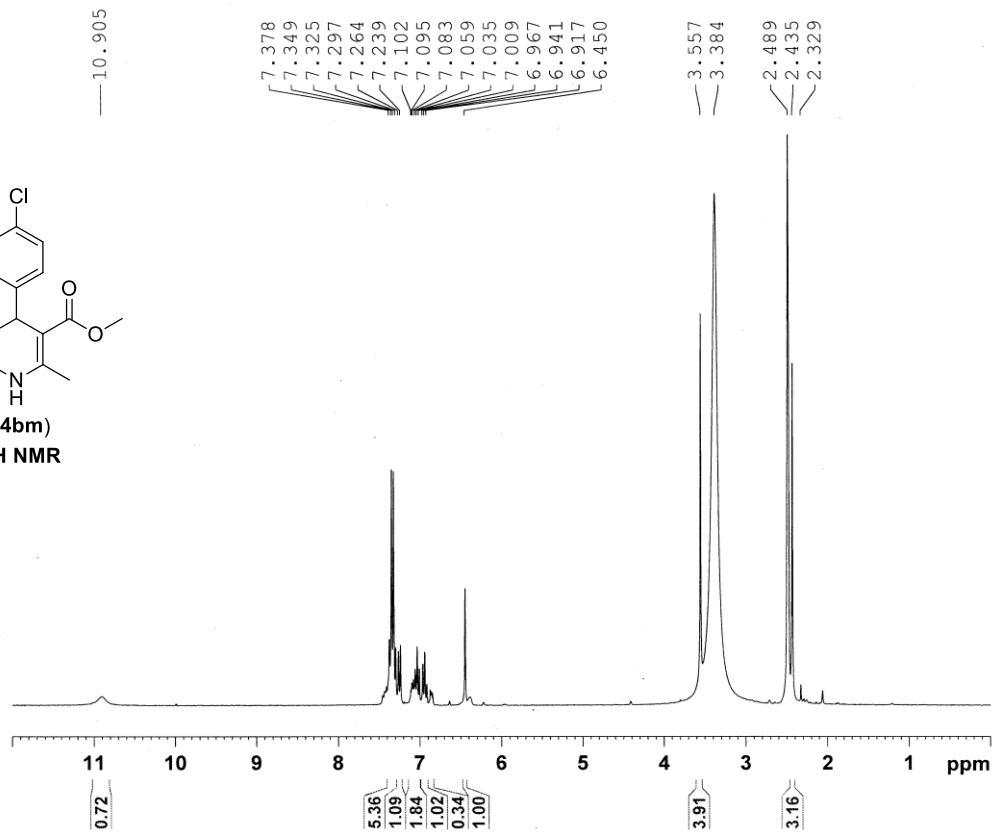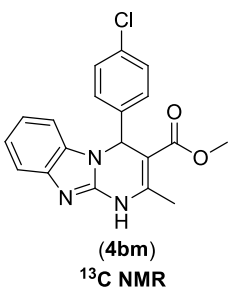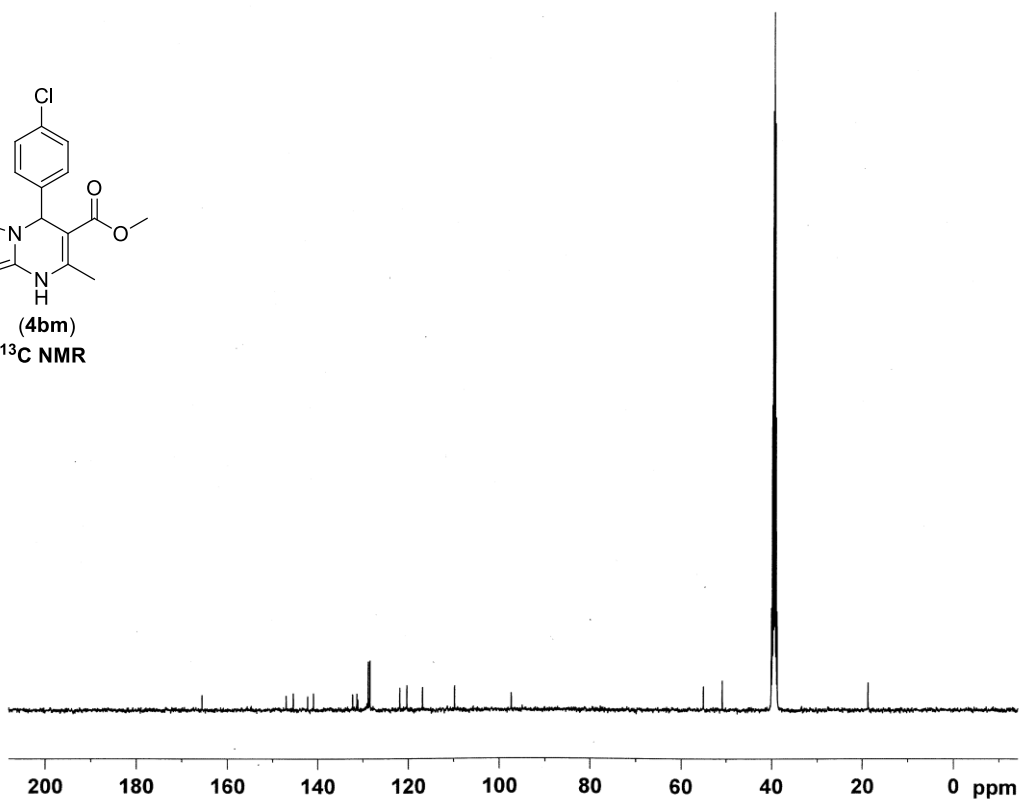

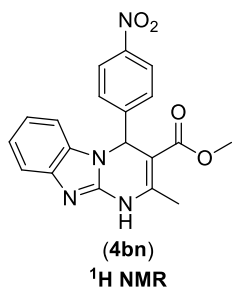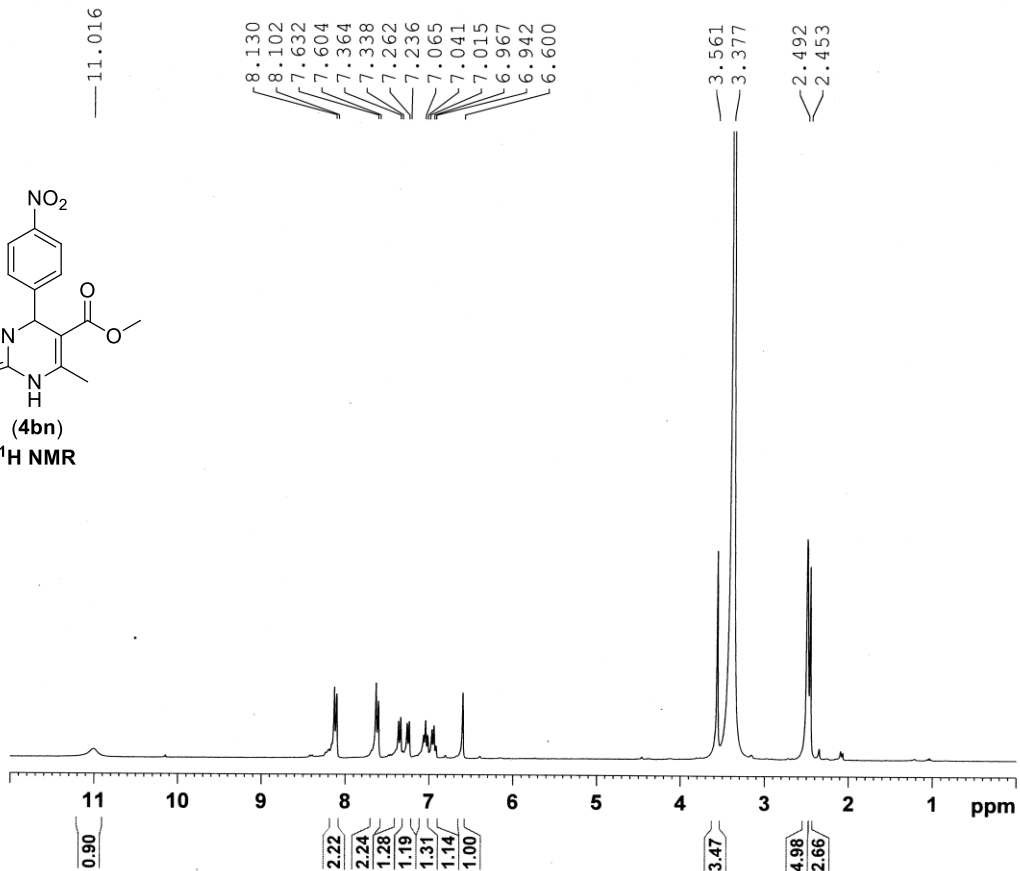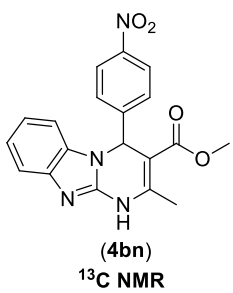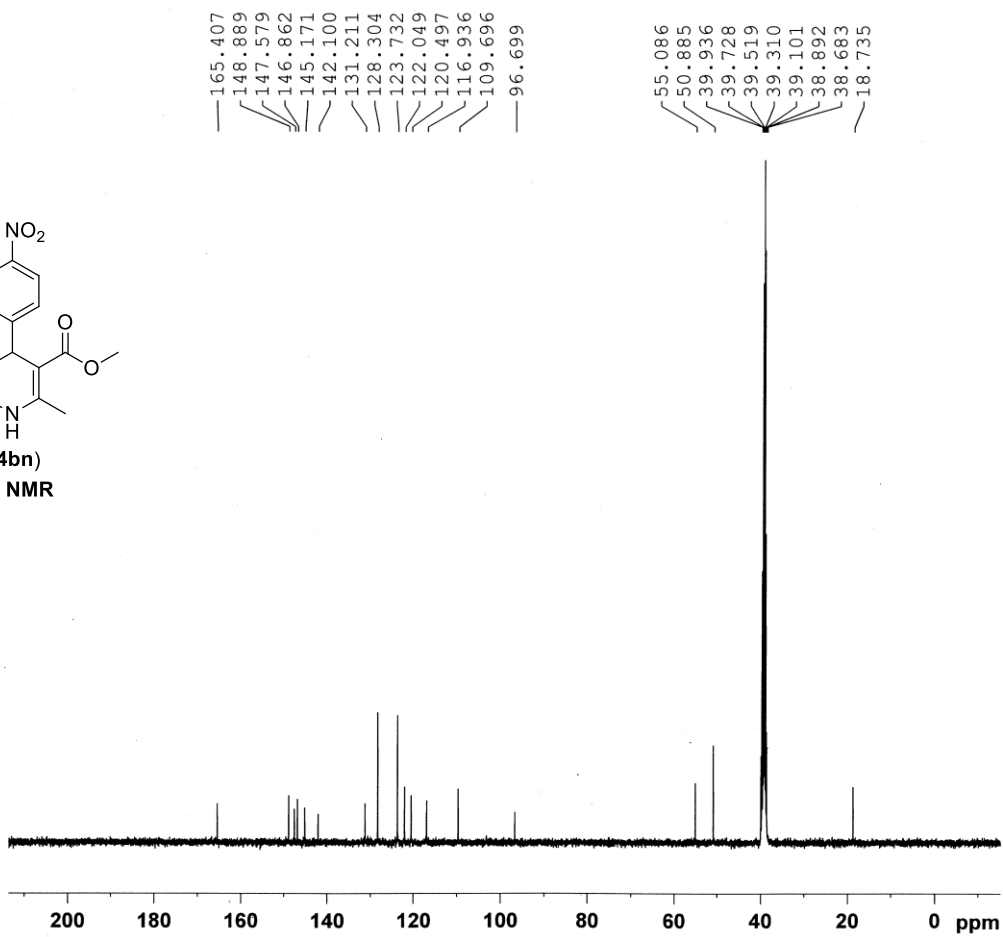

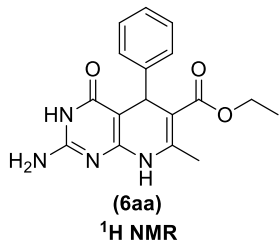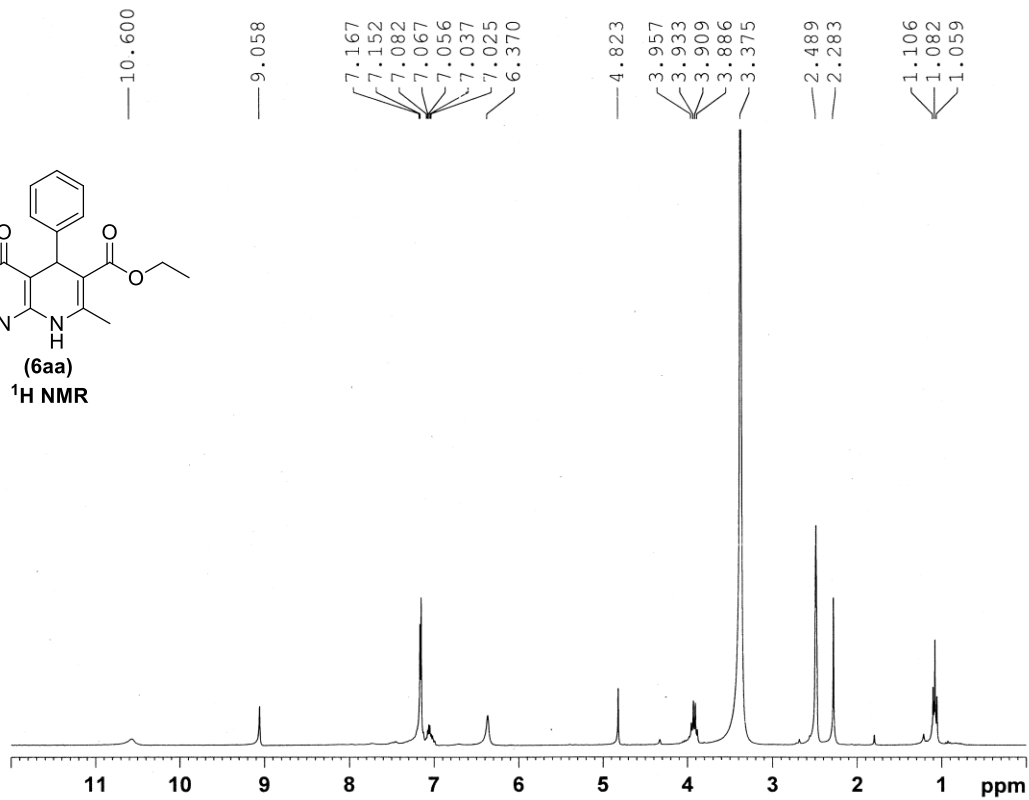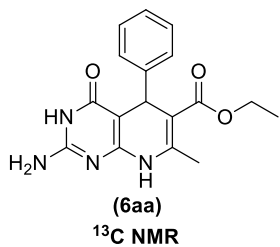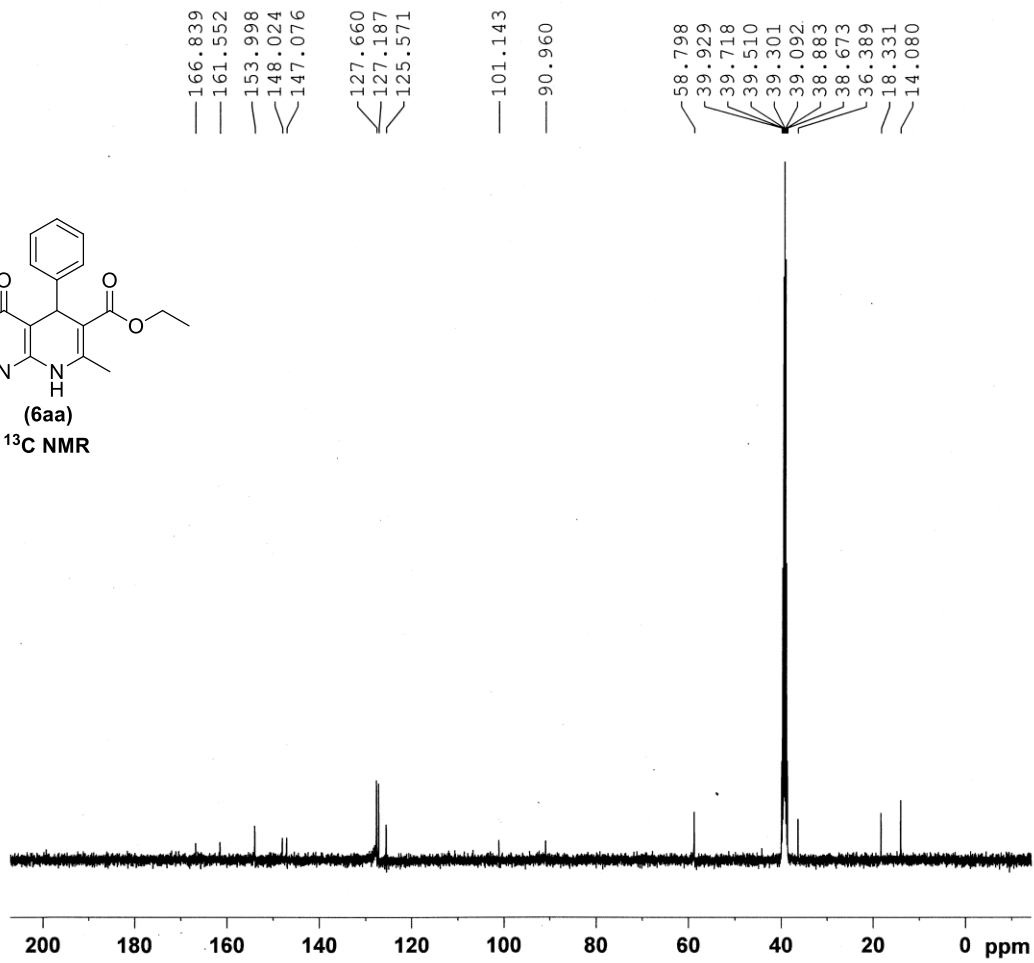

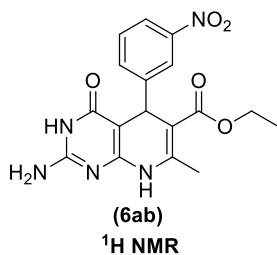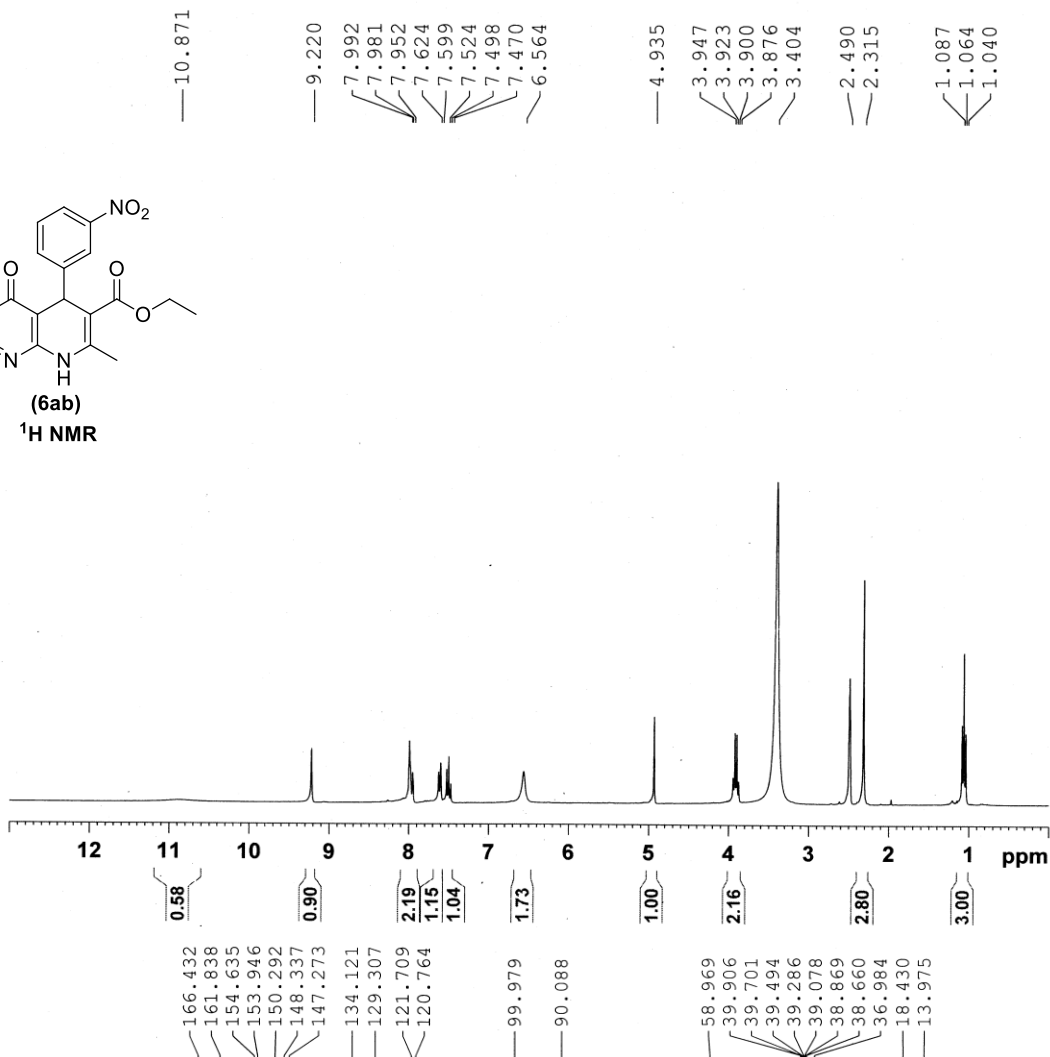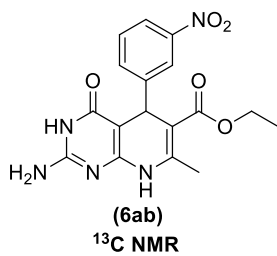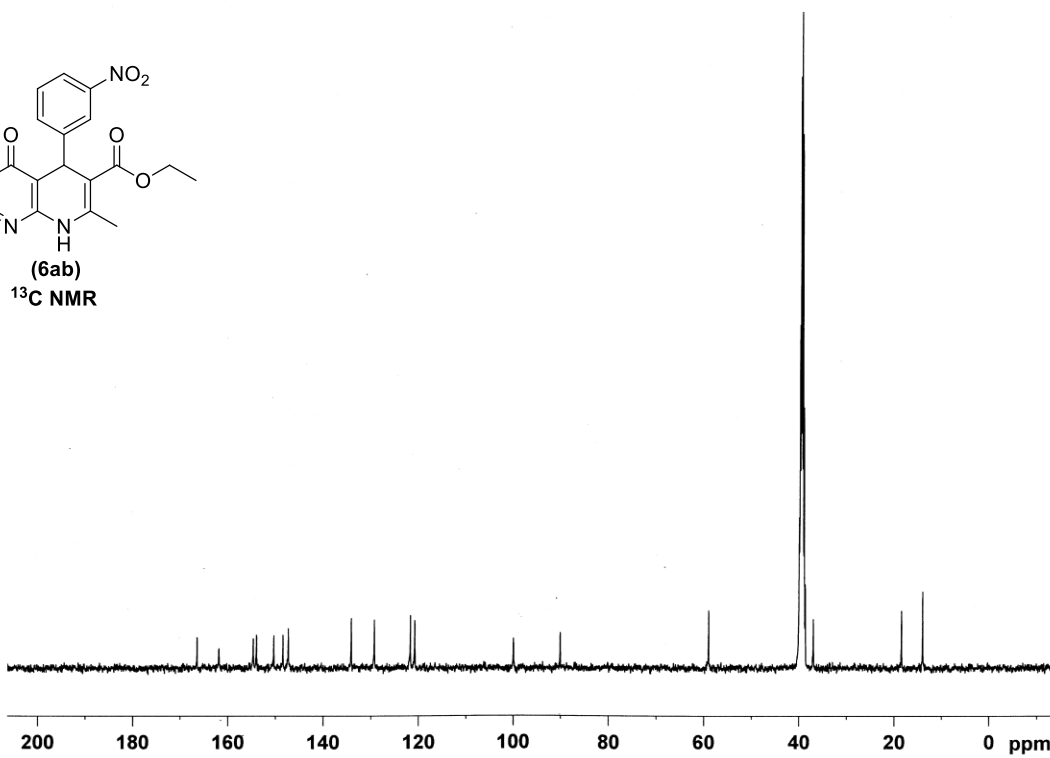



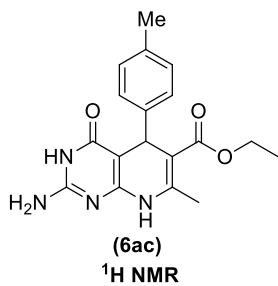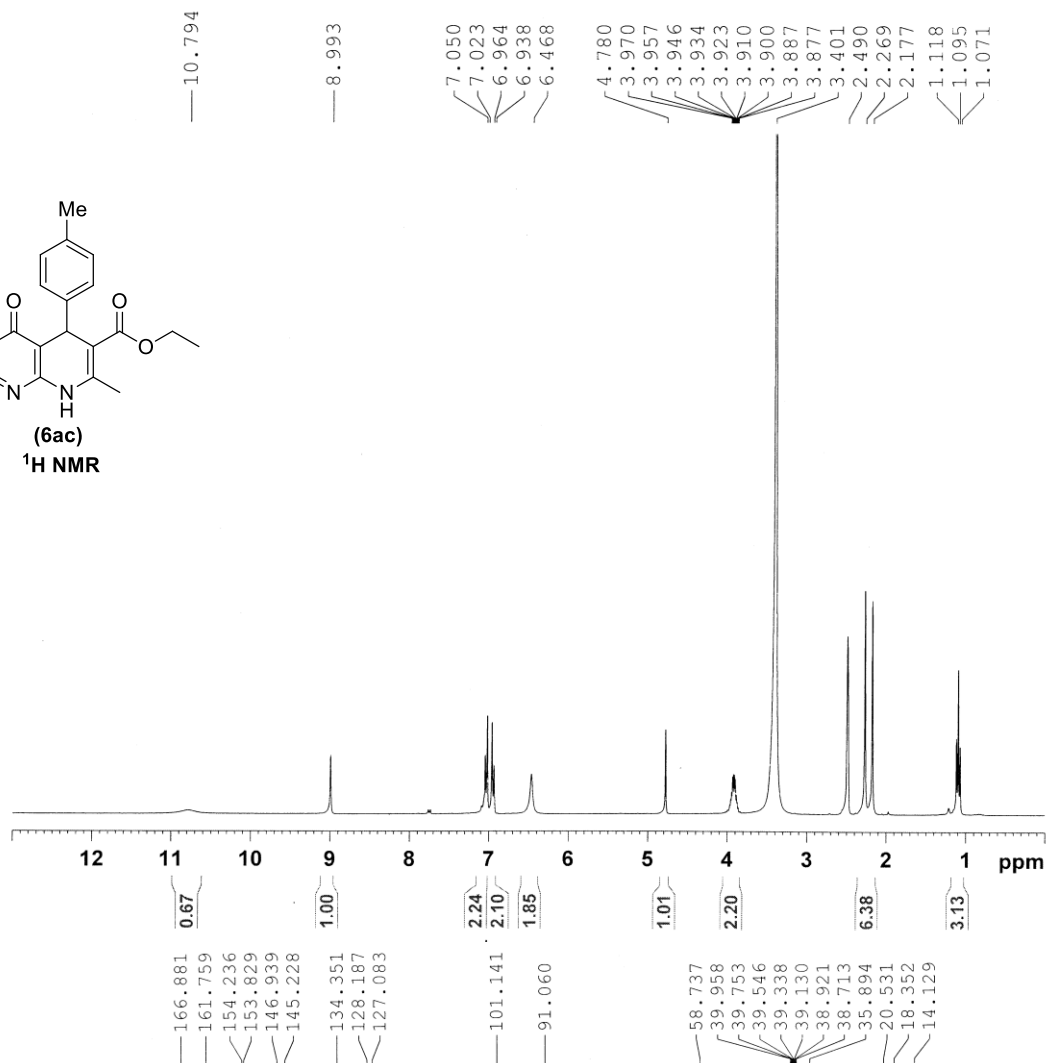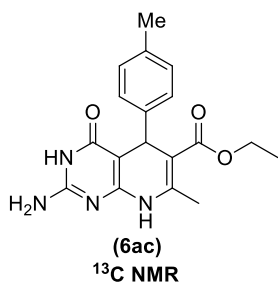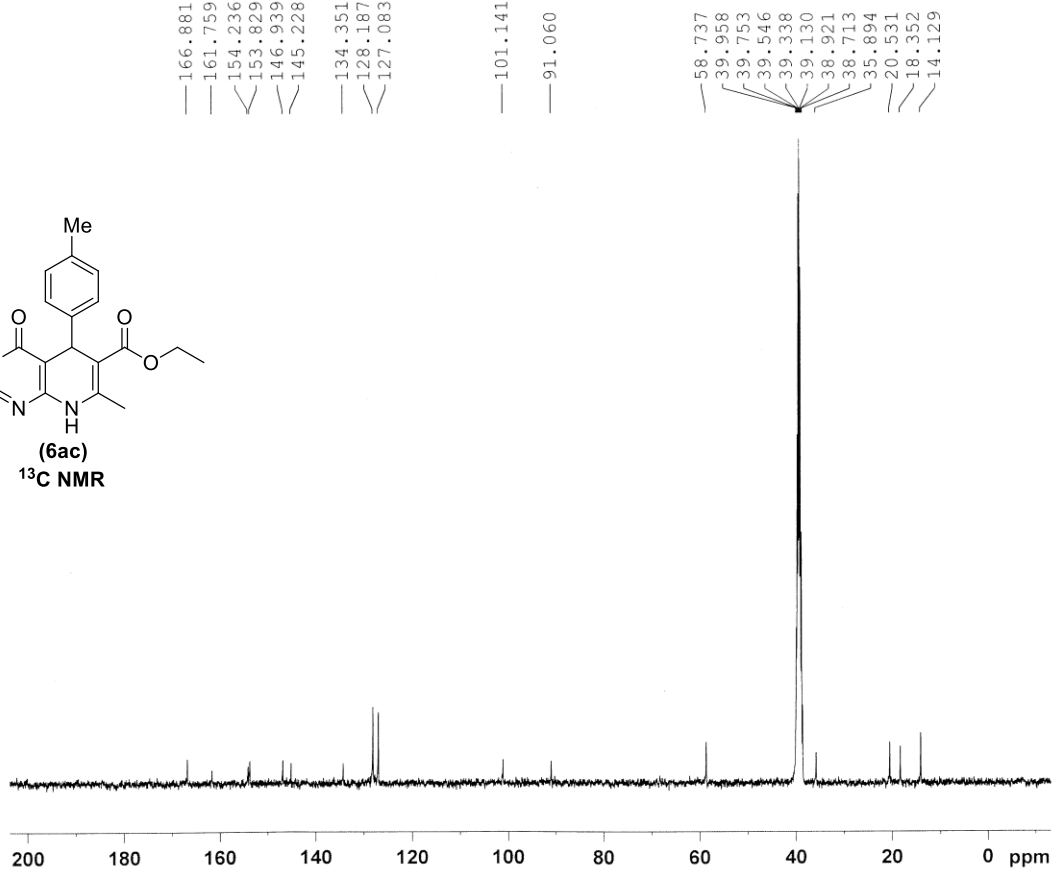

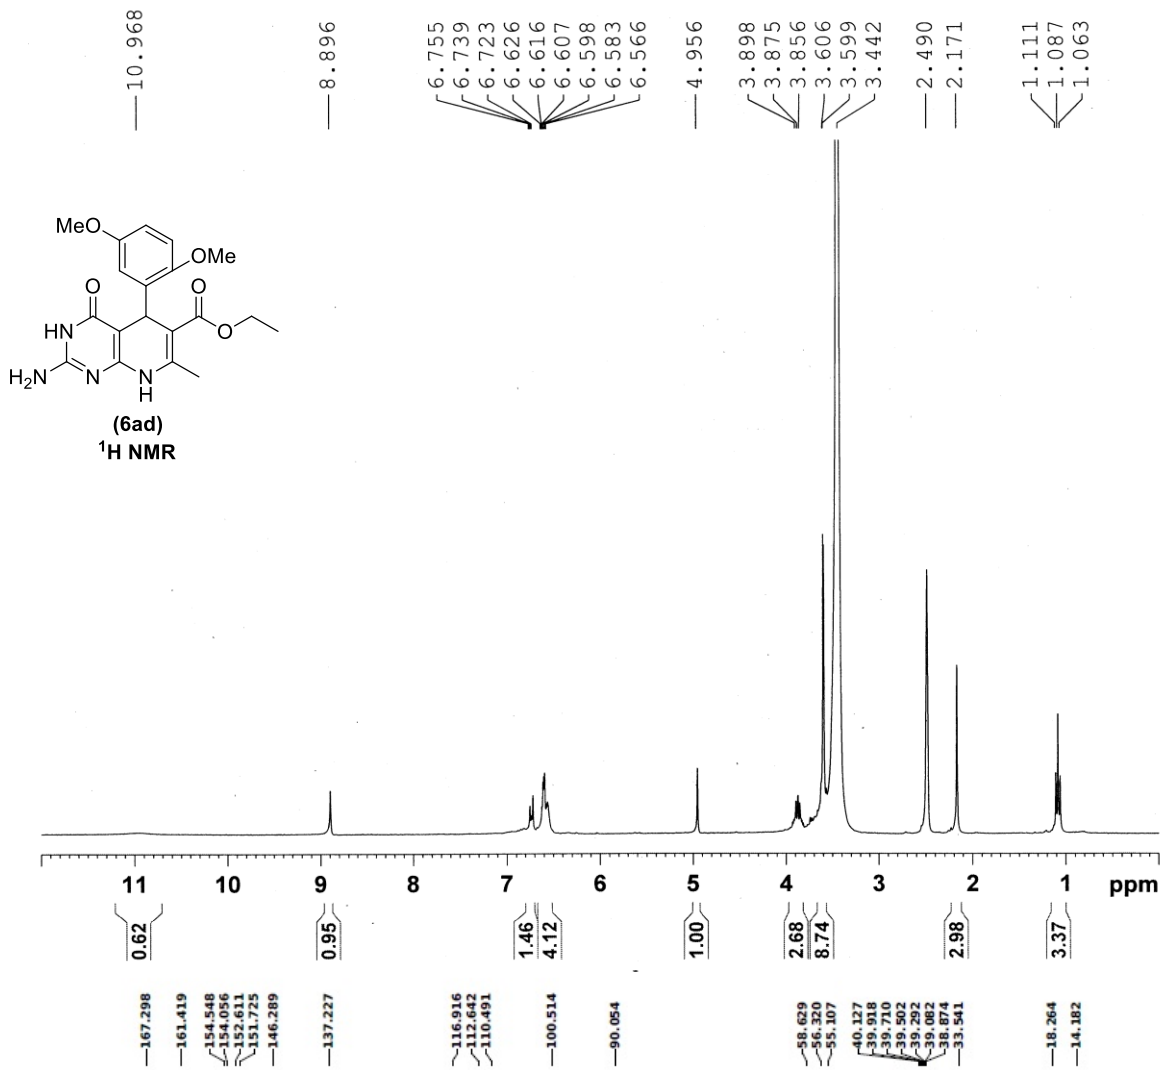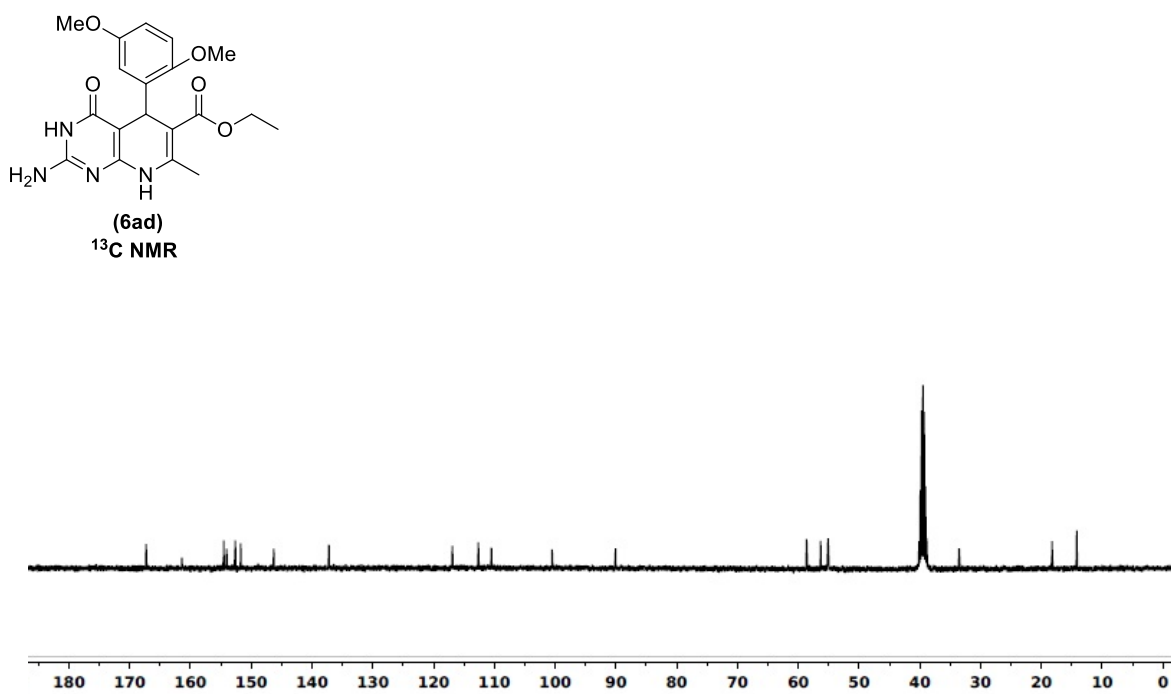

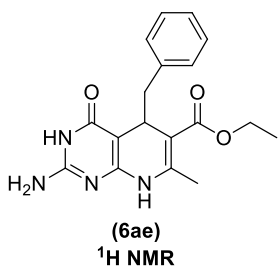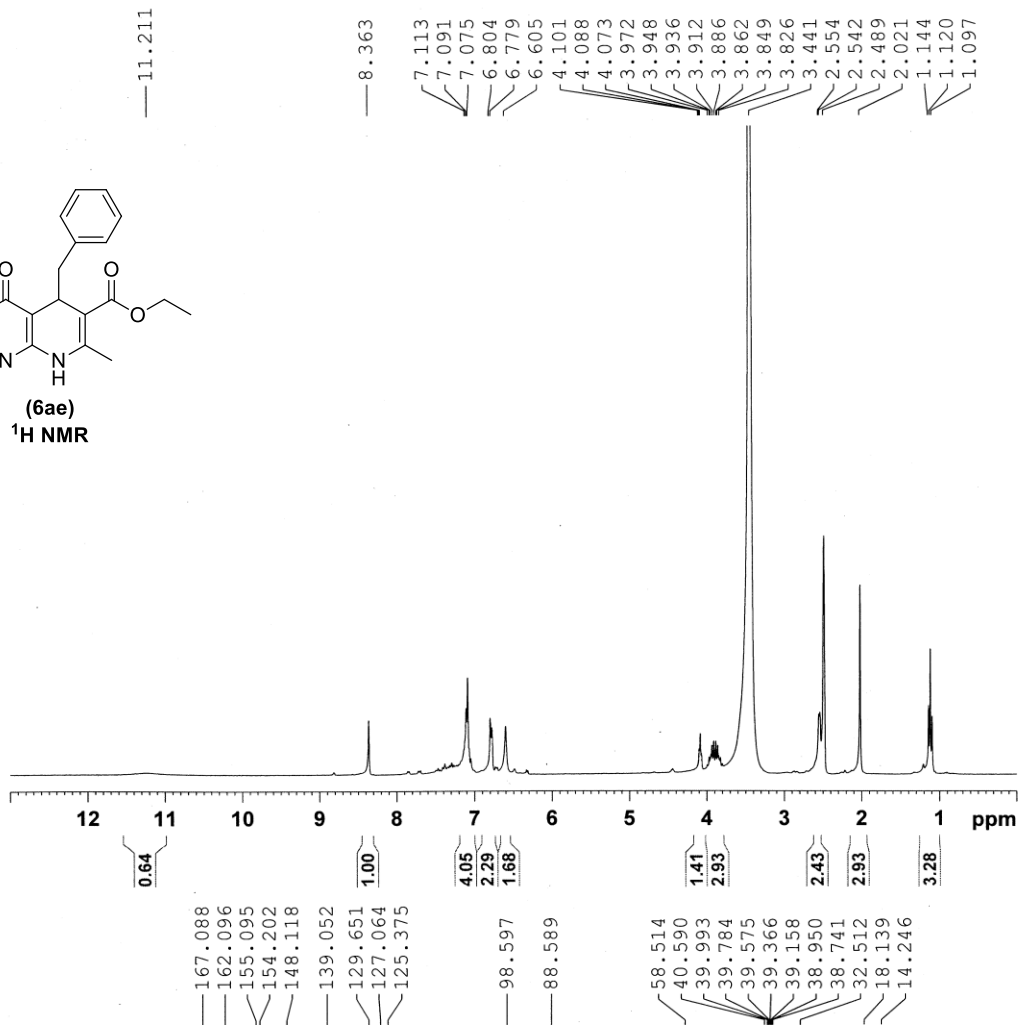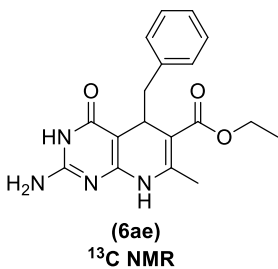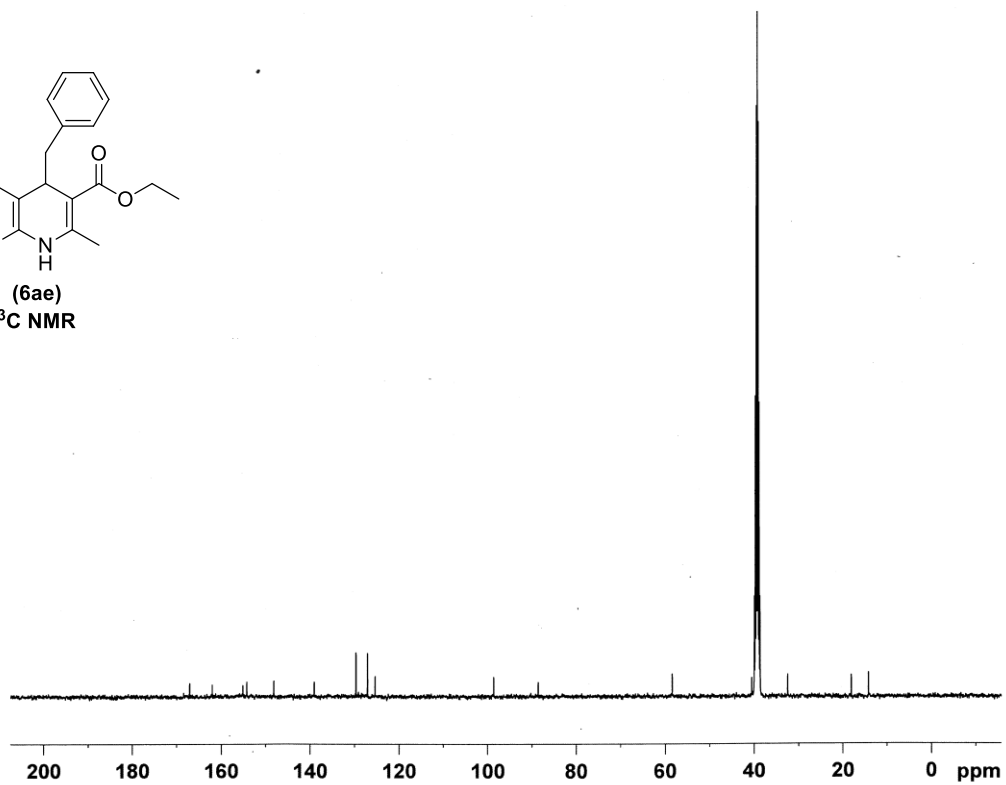

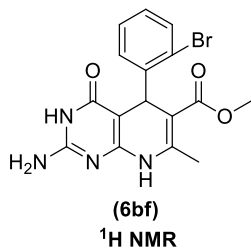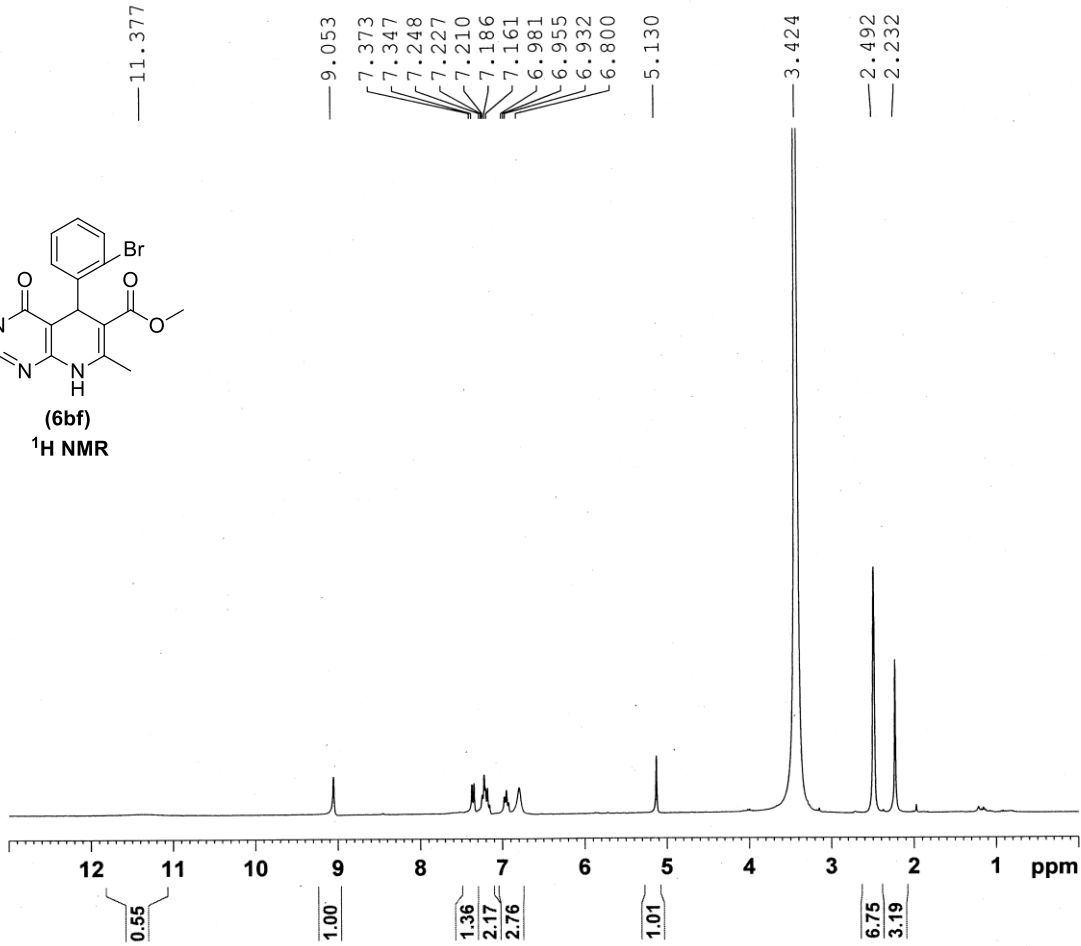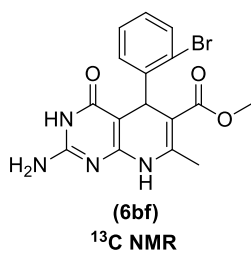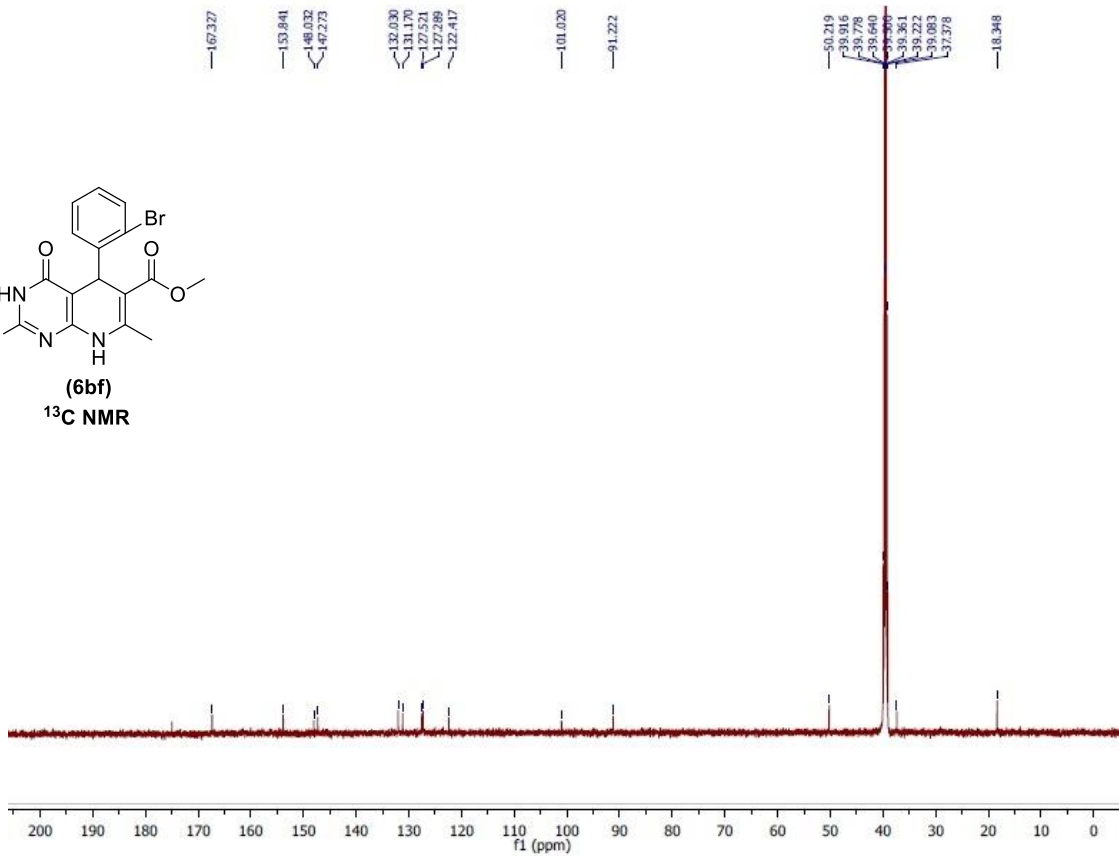

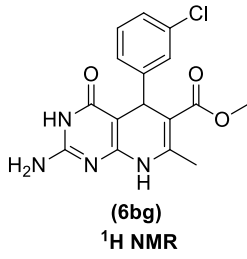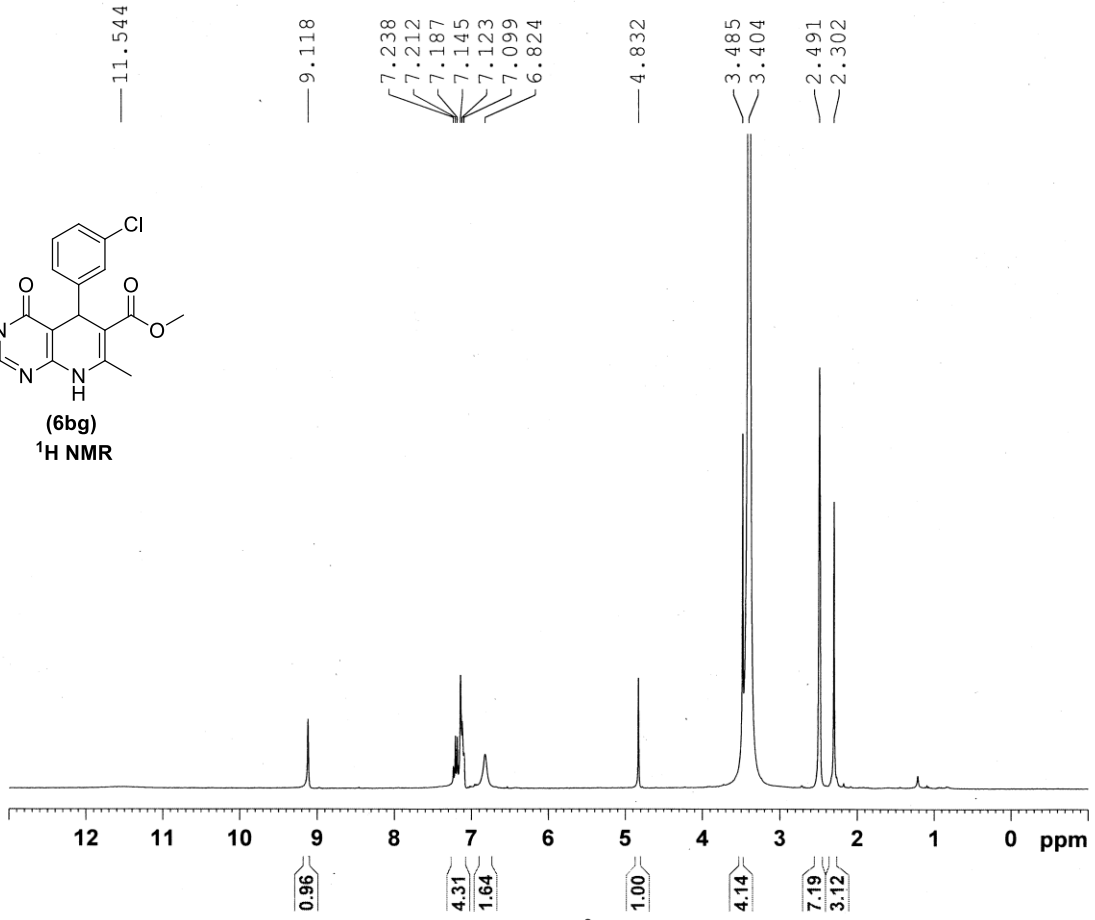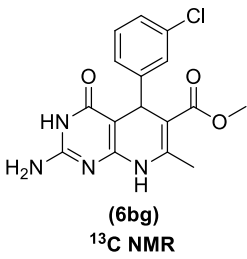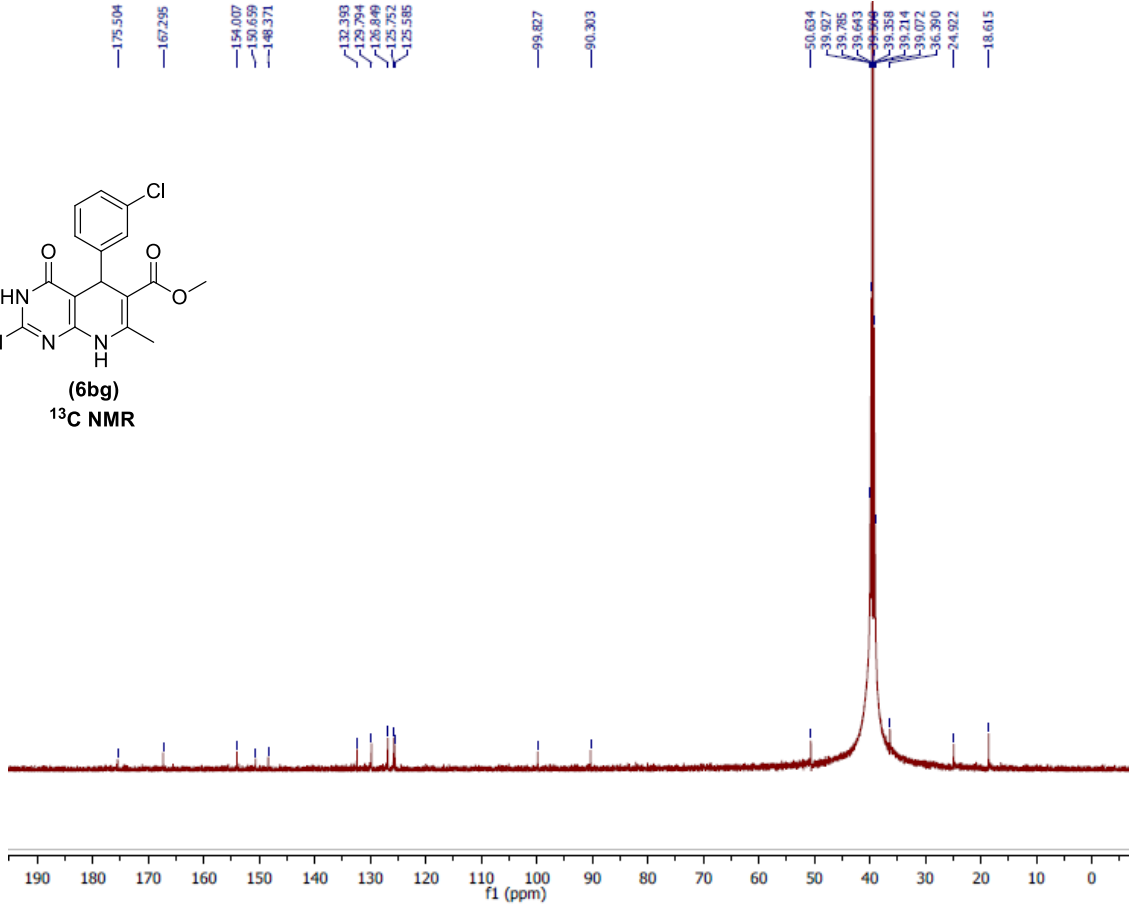

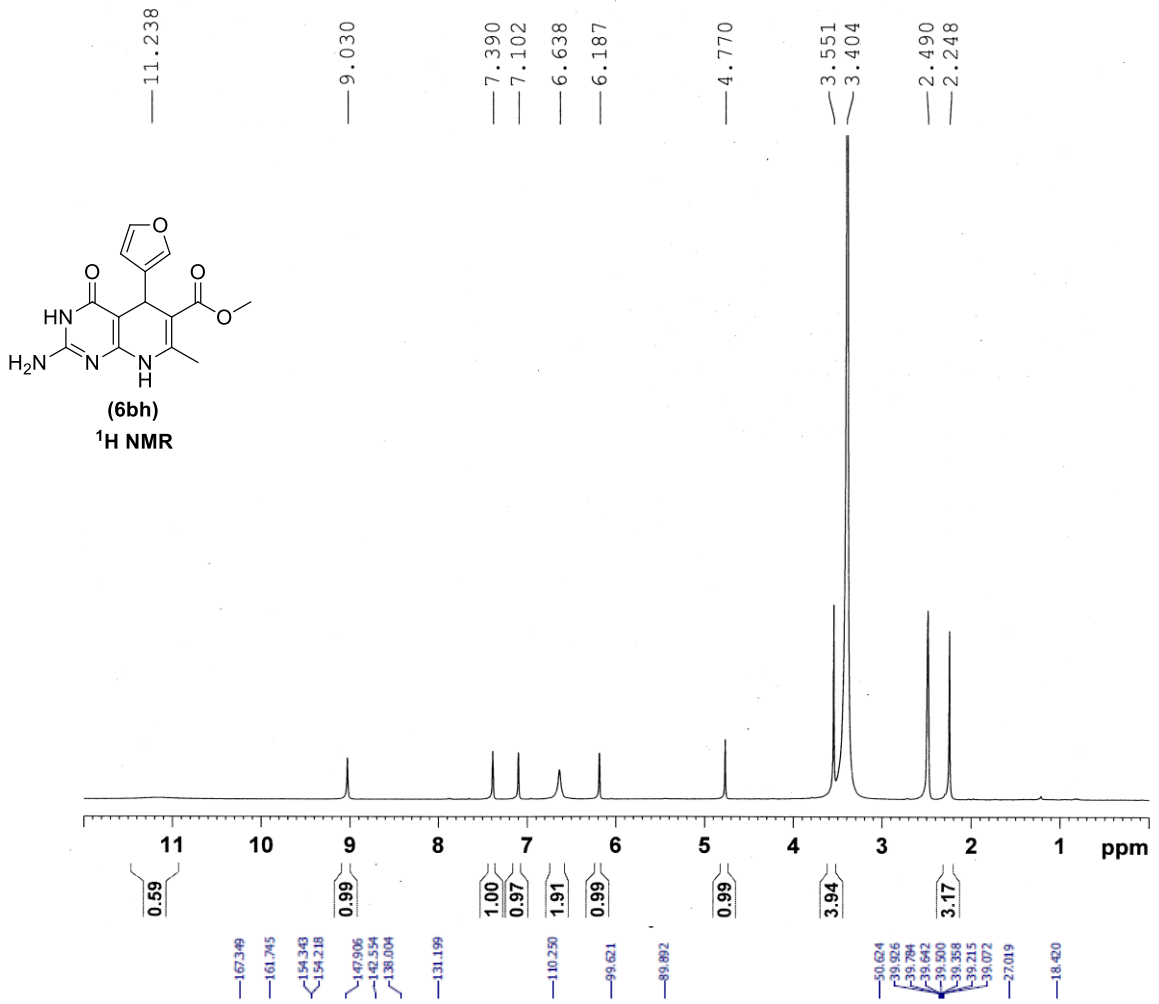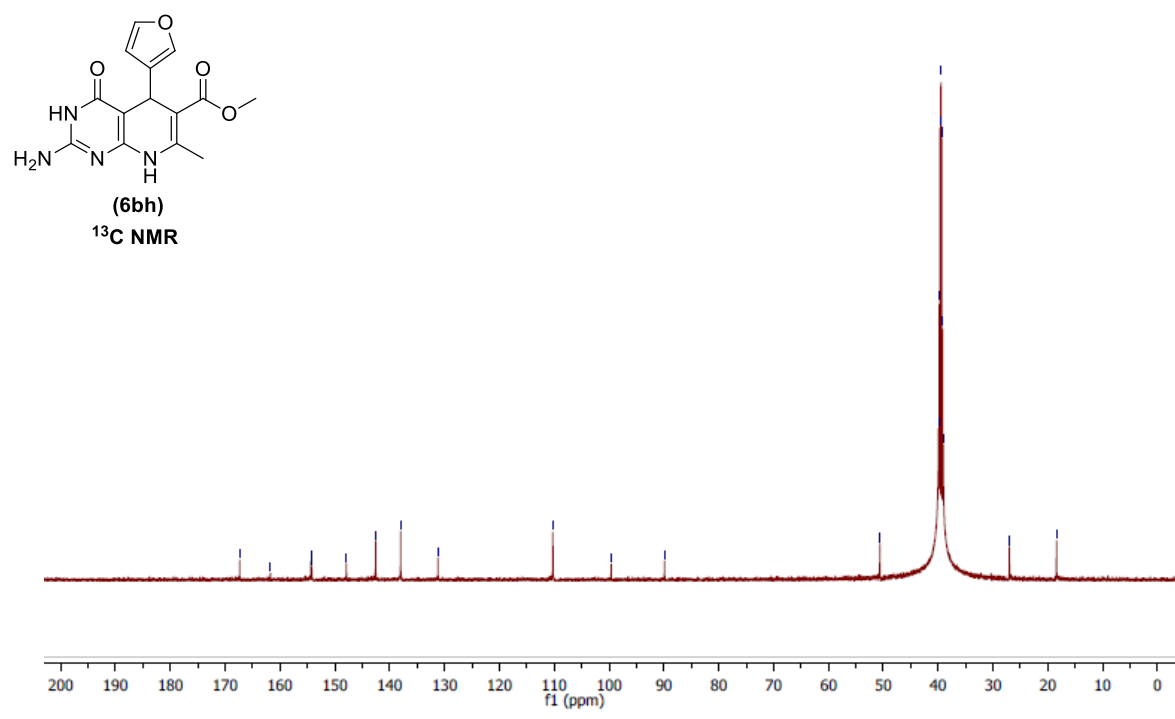

Supplement: c6ra21376f1.pdf [file c6ra21376f1.pdf]
